# Supplementary material
Source: MDPI journal article supplement (https://www.mdpi.com/2673-933X/2/2/15)
Supplement: s1 [file s1]

**Additional File S3.** Matrix of the number of peaks per sample, the number of peak intersections between pairwise comparisons and the Jaccard similarity score between pairwise comparisons for butyrate (BT) and control (CT) samples. The top of the diagonal (light red) is the number of peak intersections between pairwise comparisons. The yellow diagonal line is the number of peaks per sample. The bottom of the diagonal (green) is the Jaccard score between pairwise comparisons. Each condition has two biological replicates.

| Condition | BT1            | BT2            | CT1            | CT2            |
|-----------|----------------|----------------|----------------|----------------|
| BT1       | <b>118,521</b> | 95908          | 84039          | 98204          |
| BT2       | 0.6458         | <b>113,935</b> | 83315          | 96931          |
| CT1       | 0.5565         | 0.5623         | <b>102,063</b> | 98678          |
| CT2       | 0.5784         | 0.5745         | 0.6428         | <b>135,755</b> |
