# Supplementary material
Source: MDPI journal article supplement (https://www.mdpi.com/2673-933X/2/2/15)
Supplement: s1 [file s1]

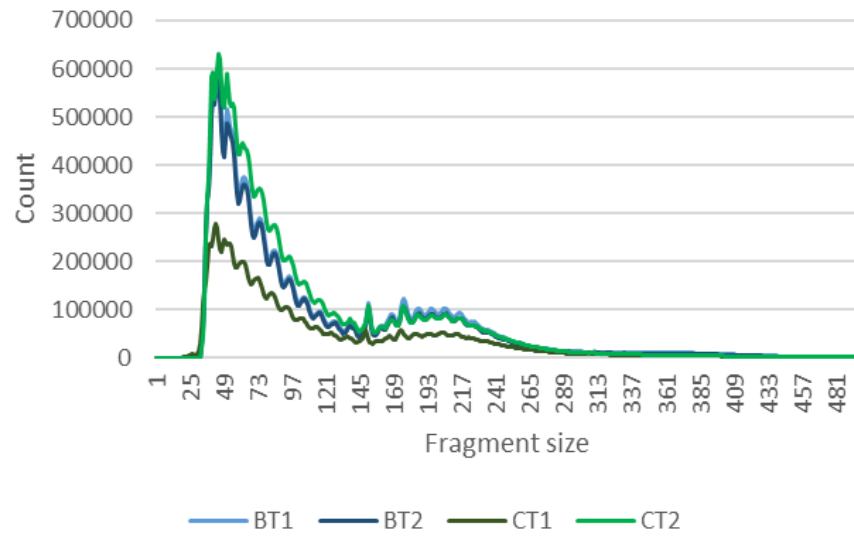

**Additional File S1.** Fragment size distribution of ATAC-seq reads in the butyrate condition. Each condition has two biological replicates. BT: Butyrate; CT: Control.
