# Supplementary material
Source: MDPI journal article supplement (https://www.mdpi.com/2673-933X/2/2/15)
Supplement: s1 [file s1]

i-cisTarget

An integrative genomics method for the prediction of regulatory features and cis-regulatory modules.

Parameters and statistics for Butyrate-DARs-cattle

|                                                   |                                       |
|---------------------------------------------------|---------------------------------------|
| Number of features                                | 29890                                 |
| Number of enriched features (NES > 3.0)           | 272                                   |
| Total number of ranked regions                    | 1223024                               |
| Type of input query                               | bed                                   |
| Number of <b>i-cisTarget</b> regions in input set | 15181 (Results of the region mapping) |
| Minimum fraction of overlap                       | 0.4                                   |
| Normalized enrichment score (NES) threshold       | 3.0                                   |
| AUC threshold (fraction / # of ranked regions)    | 0.005 (6115)                          |
| Recovery curve threshold (# of regions)           | 20000                                 |

AUC distribution

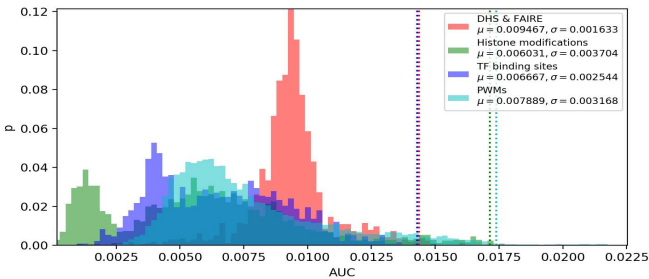

Recovery of best feature

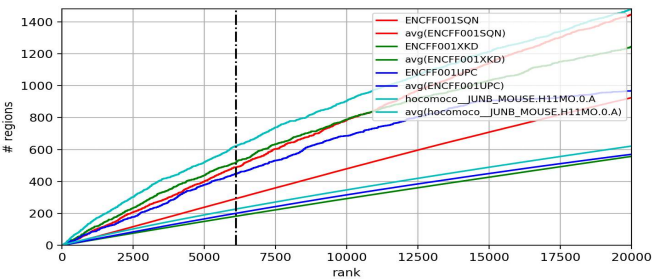

Results for Butyrate-DARs-cattle

Select features in the table below, select an operation and proceed.

1.

☐ Use candidate target regions as **filter** and use as input for i-cisTarget again.
2.

☐ **Scan** candidate target regions of selected features for multiple homotypic CRMs.
3.

☐ **Create SIF file** for the selected features.

This report is also available as an **archive**.

| # | Feature                                                                                                          | NES     | Logo | Recovery Curve | Candidate regions targets | All regions in top 20000 | Database |
|---|------------------------------------------------------------------------------------------------------------------|---------|------|----------------|---------------------------|--------------------------|----------|
| 1 | <input type="checkbox"/> hocomoco__JUNB_MOUSE.H11MO.0.A<br>Description: JUNB_MOUSE<br>Possible TFs: JUNB         | 4.62037 |      |                | <a href="#">link</a>      | <a href="#">link</a>     | PWMs     |
| 2 | <input type="checkbox"/> homer__NNATGASTCATH_Fra1<br>Description: Fra1(bZIP)/BT549-Fra1-ChIP-Seq(GSE46166)/Homer | 4.54460 |      |                | <a href="#">link</a>      | <a href="#">link</a>     | PWMs     |
| 3 | <input type="checkbox"/> transfac_pro__M08936<br>Description: V\$JUNFOSB_01: C-JUN:FOSB<br>Possible TFs: FOSB    | 4.49997 |      |                | <a href="#">link</a>      | <a href="#">link</a>     | PWMs     |
| 4 | <input type="checkbox"/> transfac_pro__M08940<br>Description: V\$JUNFRA2_01: C-JUN:FRA-2<br>Possible TFs: FOSL2  | 4.42647 |      |                | <a href="#">link</a>      | <a href="#">link</a>     | PWMs     |

| #  | Feature                                                                                                                                                                                    | NES     | Logo                                                                                | Recovery Curve                                                                       | Candidate targets    | All regions in top 20000 | Database |
|----|--------------------------------------------------------------------------------------------------------------------------------------------------------------------------------------------|---------|-------------------------------------------------------------------------------------|--------------------------------------------------------------------------------------|----------------------|--------------------------|----------|
| 5  | <input type="checkbox"/> transfac_pro__M08938<br>Description: V\$JUNFRA1_01: C-JUN:FRA-1<br>Possible TFs: FOSL1                                                                            | 4.42494 | 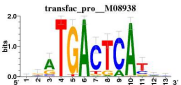   |    | <a href="#">link</a> | <a href="#">link</a>     | PWMs     |
| 6  | <input type="checkbox"/> hocomoco__JUND_MOUSE.H11MO.0.A<br>Description: JUND_MOUSE<br>Possible TFs: JUND                                                                                   | 4.40740 |    |    | <a href="#">link</a> | <a href="#">link</a>     | PWMs     |
| 7  | <input type="checkbox"/> transfac_pro__M08942<br>Description: V\$FOSJUN_02: C-FOS:C-JUN<br>Possible TFs: JUN                                                                               | 4.40547 |    |    | <a href="#">link</a> | <a href="#">link</a>     | PWMs     |
| 8  | <input type="checkbox"/> hocomoco__FOSL1_HUMAN.H11MO.0.A<br>Description: FOSL1_HUMAN<br>Possible TFs: FOSL1                                                                                | 4.40469 |    |    | <a href="#">link</a> | <a href="#">link</a>     | PWMs     |
| 9  | <input type="checkbox"/> transfac_pro__M08933<br>Description: V\$JUNDFOS_01: JUND:C-FOS<br>Possible TFs: JUND                                                                              | 4.39691 |    |    | <a href="#">link</a> | <a href="#">link</a>     | PWMs     |
| 10 | <input type="checkbox"/> dbcorrd__FOS__ENCSR000DOP_1__m1<br>Description: FOS (ENCSR000DOP-1, motif 1)<br>Possible TFs: FOS                                                                 | 4.39392 |    |    | <a href="#">link</a> | <a href="#">link</a>     | PWMs     |
| 11 | <input type="checkbox"/> jasper__MA0476.1<br>Description: FOS<br>Possible TFs: FOS                                                                                                         | 4.39011 |  |  | <a href="#">link</a> | <a href="#">link</a>     | PWMs     |
| 12 | <input type="checkbox"/> transfac_pro__M08923<br>Description: V\$JUNBFRA2_01: JUNB:FRA-2<br>Possible TFs: JUNB                                                                             | 4.38607 |  |  | <a href="#">link</a> | <a href="#">link</a>     | PWMs     |
| 13 | <input type="checkbox"/> transfac_pro__M08922<br>Description: V\$JUNBFRA1_01: JUNB:FRA-1<br>Possible TFs: JUNB                                                                             | 4.37477 |  |  | <a href="#">link</a> | <a href="#">link</a>     | PWMs     |
| 14 | <input type="checkbox"/> dbcorrd__FOS__ENCSR000EVU_1__m1<br>Description: FOS (ENCSR000EVU-1, motif 1)<br>Possible TFs: FOS                                                                 | 4.37239 |  |  | <a href="#">link</a> | <a href="#">link</a>     | PWMs     |
| 15 | <input type="checkbox"/> cisbp__M2291<br>Description: JUNB[ gene ID: "ENSG00000171223" species: "Homo sapiens" TF status: "direct" TF family: "bZIP" DBDs: "bZIP_1"]<br>Possible TFs: JUNB | 4.36148 |  |  | <a href="#">link</a> | <a href="#">link</a>     | PWMs     |
| 16 | <input type="checkbox"/> dbcorrd__FOS__ENCSR000DOO_1__m1<br>Description: FOS (ENCSR000DOO-1, motif 1)<br>Possible TFs: FOS                                                                 | 4.35714 |  |  | <a href="#">link</a> | <a href="#">link</a>     | PWMs     |
| 17 | <input type="checkbox"/> dbcorrd__FOS__ENCSR000DOT_1__m1<br>Description: FOS (ENCSR000DOT-1, motif 1)<br>Possible TFs: FOS                                                                 | 4.34861 |  |  | <a href="#">link</a> | <a href="#">link</a>     | PWMs     |

| #  | Feature                                                                                                                                                                                                                                                                                                                                                                                                                                                    | NES     | Logo | Recovery Curve | Candidate targets    | All regions in top 20000 | Database |
|----|------------------------------------------------------------------------------------------------------------------------------------------------------------------------------------------------------------------------------------------------------------------------------------------------------------------------------------------------------------------------------------------------------------------------------------------------------------|---------|------|----------------|----------------------|--------------------------|----------|
| 18 | <input type="checkbox"/> dbcorrd__FOS__ENCSR000DON_1__m1<br>Description: FOS (ENCSR000DON-1, motif 1)<br>Possible TFs: FOS                                                                                                                                                                                                                                                                                                                                 | 4.34622 |      |                | <a href="#">link</a> | <a href="#">link</a>     | PWMs     |
| 19 | <input type="checkbox"/> cisbp__M0344<br>Description: M0344                                                                                                                                                                                                                                                                                                                                                                                                | 4.34134 |      |                | <a href="#">link</a> | <a href="#">link</a>     | PWMs     |
| 20 | <input type="checkbox"/> cisbp__M4531<br>Description: JUN[ <i>gene ID: "ENSG00000177606"</i> species: "Homo sapiens" TF status: "direct" TF family: "bZIP" DBDs: "bZIP_1"]<br>Possible TFs: JUN                                                                                                                                                                                                                                                            | 4.33870 |      |                | <a href="#">link</a> | <a href="#">link</a>     | PWMs     |
| 21 | <input type="checkbox"/> jaspar__MA0478.1<br>Description: FOSL2<br>Possible TFs: FOSL2                                                                                                                                                                                                                                                                                                                                                                     | 4.33314 |      |                | <a href="#">link</a> | <a href="#">link</a>     | PWMs     |
| 22 | <input type="checkbox"/> jaspar__MA0490.1<br>Description: JUNB<br>Possible TFs: JUNB                                                                                                                                                                                                                                                                                                                                                                       | 4.33075 |      |                | <a href="#">link</a> | <a href="#">link</a>     | PWMs     |
| 23 | <input type="checkbox"/> cisbp__M2280<br>Description: FOSL2[ <i>gene ID: "ENSG00000075426"</i> species: "Homo sapiens" TF status: "direct" TF family: "bZIP" DBDs: "bZIP_1"]<br>Possible TFs: FOSL2                                                                                                                                                                                                                                                        | 4.32917 |      |                | <a href="#">link</a> | <a href="#">link</a>     | PWMs     |
| 24 | <input type="checkbox"/> cisbp__M4590<br>Description: FOS[ <i>gene ID: "ENSG00000170345"</i> species: "Homo sapiens" TF status: "direct" TF family: "bZIP" DBDs: "bZIP_1"]; Fos[ <i>gene ID: "ENSMUSG00000021250"</i> species: "Mus musculus" TF status: "inferred" TF family: "bZIP" DBDs: "bZIP_1"]; Fosb[ <i>gene ID: "ENSMUSG00000003545"</i> species: "Mus musculus" TF status: "inferred" TF family: "bZIP" DBDs: "bZIP_1"]<br>Possible TFs: FOS     | 4.32882 |      |                | <a href="#">link</a> | <a href="#">link</a>     | PWMs     |
| 25 | <input type="checkbox"/> cisbp__M4619<br>Description: FOSL1[ <i>gene ID: "ENSG00000175592"</i> species: "Homo sapiens" TF status: "direct" TF family: "bZIP" DBDs: "bZIP_1"]; Fos[ <i>gene ID: "ENSMUSG00000021250"</i> species: "Mus musculus" TF status: "inferred" TF family: "bZIP" DBDs: "bZIP_1"]; Fosb[ <i>gene ID: "ENSMUSG00000003545"</i> species: "Mus musculus" TF status: "inferred" TF family: "bZIP" DBDs: "bZIP_1"]<br>Possible TFs: FOSL1 | 4.31522 |      |                | <a href="#">link</a> | <a href="#">link</a>     | PWMs     |
| 26 | <input type="checkbox"/> cisbp__M6319<br>Description: JUN[ <i>gene ID: "ENSG00000177606"</i> species: "Homo sapiens" TF status: "direct" TF family: "bZIP" DBDs: "bZIP_1"]<br>Possible TFs: JUN                                                                                                                                                                                                                                                            | 4.31448 |      |                | <a href="#">link</a> | <a href="#">link</a>     | PWMs     |
| 27 | <input type="checkbox"/> cisbp__M2278<br>Description: FOS[ <i>gene ID: "ENSG00000170345"</i> species: "Homo sapiens" TF status: "direct" TF family: "bZIP" DBDs: "bZIP_1"]; Fos[ <i>gene ID: "ENSMUSG00000021250"</i> species: "Mus musculus" TF status: "inferred" TF family: "bZIP" DBDs: "bZIP_1"]; Fosb[ <i>gene ID: "ENSMUSG00000003545"</i> species: "Mus musculus" TF status: "inferred" TF family: "bZIP" DBDs: "bZIP_1"]<br>Possible TFs: FOS     | 4.30592 |      |                | <a href="#">link</a> | <a href="#">link</a>     | PWMs     |

| #  | Feature                                                                                                                                                                                    | NES     | Logo                                                                                | Recovery Curve                                                                       | Candidate targets    | All regions in top 20000 | Database |
|----|--------------------------------------------------------------------------------------------------------------------------------------------------------------------------------------------|---------|-------------------------------------------------------------------------------------|--------------------------------------------------------------------------------------|----------------------|--------------------------|----------|
| 28 | <input type="checkbox"/> transfac_pro_M08920<br>Description: V\$JUNBFOSB_01: JUNB:FOSB<br>Possible TFs: JUNB                                                                               | 4.30096 | 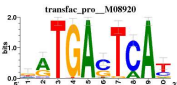   |    | <a href="#">link</a> | <a href="#">link</a>     | PWMs     |
| 29 | <input type="checkbox"/> homer_ATGACTCATC_AP-1<br>Description: AP-1(bZIP)/ThioMac-PU.1-ChIP-Seq(GSE21512)/Homer<br>Possible TFs: JUN                                                       | 4.29999 |    |    | <a href="#">link</a> | <a href="#">link</a>     | PWMs     |
| 30 | <input type="checkbox"/> hocomoco_FOS_HUMAN.H11MO.0.A<br>Description: FOS_HUMAN<br>Possible TFs: FOS                                                                                       | 4.29536 |    |    | <a href="#">link</a> | <a href="#">link</a>     | PWMs     |
| 31 | <input type="checkbox"/> cisbp_M4570<br>Description: JUND[gene ID: "ENSG00000130522" species: "Homo sapiens" TF status: "direct" TF family: "bZIP" DBDs: "bZIP_1"]<br>Possible TFs: JUND   | 4.28317 |    |    | <a href="#">link</a> | <a href="#">link</a>     | PWMs     |
| 32 | <input type="checkbox"/> cisbp_M4623<br>Description: JUNB[gene ID: "ENSG00000171223" species: "Homo sapiens" TF status: "direct" TF family: "bZIP" DBDs: "bZIP_1"]<br>Possible TFs: JUNB   | 4.27888 |    |    | <a href="#">link</a> | <a href="#">link</a>     | PWMs     |
| 33 | <input type="checkbox"/> hocomoco_FOSL2_HUMAN.H11MO.0.A<br>Description: FOSL2_HUMAN<br>Possible TFs: FOSL2                                                                                 | 4.27783 |    |    | <a href="#">link</a> | <a href="#">link</a>     | PWMs     |
| 34 | <input type="checkbox"/> hocomoco_FOSB_MOUSE.H11MO.0.A<br>Description: FOSB_MOUSE<br>Possible TFs: FOSB                                                                                    | 4.27643 |  |  | <a href="#">link</a> | <a href="#">link</a>     | PWMs     |
| 35 | <input type="checkbox"/> dbcorrd_b_JUN_ENCSR000EFA_1_m1<br>Description: JUN (ENCSR000EFA-1, motif 1)<br>Possible TFs: JUN                                                                  | 4.27632 |  |  | <a href="#">link</a> | <a href="#">link</a>     | PWMs     |
| 36 | <input type="checkbox"/> transfac_pro_M08931<br>Description: V\$JUND FRA2_01: JUND:FRA-2<br>Possible TFs: FOSL2                                                                            | 4.27471 |  |  | <a href="#">link</a> | <a href="#">link</a>     | PWMs     |
| 37 | <input type="checkbox"/> factorbook_API1<br>Description: AP1<br>Possible TFs: BATF, FOS, JUNB, JUN, JUND, FOSL1, FOSL2                                                                     | 4.26428 |  |  | <a href="#">link</a> | <a href="#">link</a>     | PWMs     |
| 38 | <input type="checkbox"/> dbcorrd_b_TCF12_ENCSR000BQQ_1_m2<br>Description: TCF12 (ENCSR000BQQ-1, motif 2)<br>Possible TFs: TCF12                                                            | 4.25875 |  |  | <a href="#">link</a> | <a href="#">link</a>     | PWMs     |
| 39 | <input type="checkbox"/> cisbp_M6230<br>Description: FOSL2[gene ID: "ENSG00000075426" species: "Homo sapiens" TF status: "direct" TF family: "bZIP" DBDs: "bZIP_1"]<br>Possible TFs: FOSL2 | 4.25863 |  |  | <a href="#">link</a> | <a href="#">link</a>     | PWMs     |
| 40 | <input type="checkbox"/> homer_DATGASTCATHN_Atf3<br>Description: Atf3(bZIP)/GBM-ATF3-ChIP-Seq(GSE33912)/Homer<br>Possible TFs: ATF3                                                        | 4.25312 |  |  | <a href="#">link</a> | <a href="#">link</a>     | PWMs     |



| #  | Feature                                                                                                                                                                                                                                                                                                                                                                                                                                                                                                                                                       | NES     | Logo                                                                                | Recovery Curve                                                                       | Candidate targets    | All regions in top 20000 | Database |
|----|---------------------------------------------------------------------------------------------------------------------------------------------------------------------------------------------------------------------------------------------------------------------------------------------------------------------------------------------------------------------------------------------------------------------------------------------------------------------------------------------------------------------------------------------------------------|---------|-------------------------------------------------------------------------------------|--------------------------------------------------------------------------------------|----------------------|--------------------------|----------|
| 41 | <input type="checkbox"/> dbcorrd_b_FOSL2__ENCSR000BQO_1__m1<br>Description: FOSL2 (ENCSR000BQO-1, motif 1)<br>Possible TFs: FOSL2                                                                                                                                                                                                                                                                                                                                                                                                                             | 4.23137 |    |    | <a href="#">link</a> | <a href="#">link</a>     | PWMs     |
| 42 | <input type="checkbox"/> dbcorrd_b_GATA2__ENCSR000EVW_1__m3<br>Description: GATA2 (ENCSR000EVW-1, motif 3)<br>Possible TFs: GATA2                                                                                                                                                                                                                                                                                                                                                                                                                             | 4.22619 |    |    | <a href="#">link</a> | <a href="#">link</a>     | PWMs     |
| 43 | <input type="checkbox"/> dbcorrd_b_FOSL2__ENCSR000BHP_1__m1<br>Description: FOSL2 (ENCSR000BHP-1, motif 1)<br>Possible TFs: FOSL2                                                                                                                                                                                                                                                                                                                                                                                                                             | 4.21872 |    |    | <a href="#">link</a> | <a href="#">link</a>     | PWMs     |
| 44 | <input type="checkbox"/> transfac_pro__M08925<br>Description: V\$JUNBFOS_01: JUNB:C-FOS<br>Possible TFs: JUNB                                                                                                                                                                                                                                                                                                                                                                                                                                                 | 4.21219 |    |    | <a href="#">link</a> | <a href="#">link</a>     | PWMs     |
| 45 | <input type="checkbox"/> hocomoco__FOS_MOUSE.H11MO.0.A<br>Description: FOS_MOUSE<br>Possible TFs: FOS                                                                                                                                                                                                                                                                                                                                                                                                                                                         | 4.20164 |    |    | <a href="#">link</a> | <a href="#">link</a>     | PWMs     |
| 46 | <input type="checkbox"/> cisbp__M4565<br>Description: FOSL2[ <i>gene ID</i> : "ENSG00000075426" <i>species</i> : "Homo sapiens" <i>TF status</i> : "direct" <i>TF family</i> : "bZIP" <i>DBDs</i> : "bZIP_1"]; Fos[ <i>gene ID</i> : "ENSMUSG00000021250" <i>species</i> : "Mus musculus" <i>TF status</i> : "inferred" <i>TF family</i> : "bZIP" <i>DBDs</i> : "bZIP_1"]; Fosb[ <i>gene ID</i> : "ENSMUSG00000003545" <i>species</i> : "Mus musculus" <i>TF status</i> : "inferred" <i>TF family</i> : "bZIP" <i>DBDs</i> : "bZIP_1"]<br>Possible TFs: FOSL2 | 4.19941 |   |   | <a href="#">link</a> | <a href="#">link</a>     | PWMs     |
| 47 | <input type="checkbox"/> cisbp__M6318<br>Description: JUND[ <i>gene ID</i> : "ENSG00000130522" <i>species</i> : "Homo sapiens" <i>TF status</i> : "direct" <i>TF family</i> : "bZIP" <i>DBDs</i> : "bZIP_1"]<br>Possible TFs: JUND                                                                                                                                                                                                                                                                                                                            | 4.19916 |  |  | <a href="#">link</a> | <a href="#">link</a>     | PWMs     |
| 48 | <input type="checkbox"/> dbcorrd_b_JUND__ENCSR000EDH_1__m1<br>Description: JUND (ENCSR000EDH-1, motif 1)<br>Possible TFs: JUND                                                                                                                                                                                                                                                                                                                                                                                                                                | 4.19756 |  |  | <a href="#">link</a> | <a href="#">link</a>     | PWMs     |
| 49 | <input type="checkbox"/> swissregulon__sacCer__GCN4<br>Description: sacCer__GCN4                                                                                                                                                                                                                                                                                                                                                                                                                                                                              | 4.19375 |  |  | <a href="#">link</a> | <a href="#">link</a>     | PWMs     |
| 50 | <input type="checkbox"/> dbcorrd_b_JUN__ENCSR000EDG_1__m1<br>Description: JUN (ENCSR000EDG-1, motif 1)<br>Possible TFs: JUN                                                                                                                                                                                                                                                                                                                                                                                                                                   | 4.19189 |  |  | <a href="#">link</a> | <a href="#">link</a>     | PWMs     |
| 51 | <input type="checkbox"/> homer__GATGACTCATCN_Jun-API<br>Description: Jun-API(bZIP)/K562-cJun-ChIP-Seq(GSE31477)/Homer<br>Possible TFs: JUN                                                                                                                                                                                                                                                                                                                                                                                                                    | 4.19068 |  |  | <a href="#">link</a> | <a href="#">link</a>     | PWMs     |
| 52 | <input type="checkbox"/> scertf__spivak.GCN4<br>Description: spivak.GCN4                                                                                                                                                                                                                                                                                                                                                                                                                                                                                      | 4.18856 |  |  | <a href="#">link</a> | <a href="#">link</a>     | PWMs     |

| #  | Feature                                                                                                                                                                                                                                                                                                                                                                                                                        | NES     | Logo                                                                                | Recovery Curve                                                                       | Candidate targets    | All regions in top 20000 | Database    |
|----|--------------------------------------------------------------------------------------------------------------------------------------------------------------------------------------------------------------------------------------------------------------------------------------------------------------------------------------------------------------------------------------------------------------------------------|---------|-------------------------------------------------------------------------------------|--------------------------------------------------------------------------------------|----------------------|--------------------------|-------------|
| 53 | <input type="checkbox"/> flyfactorsurvey__kay_Jra_SANGER_5_FBgn0001291<br>Description: kay_Jra_SANGER_5_FBgn0001291<br>Possible TFs: JUNB, JUN, JUND                                                                                                                                                                                                                                                                           | 4.18639 | 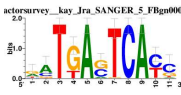   |    | <a href="#">link</a> | <a href="#">link</a>     | PWMs        |
| 54 | <input type="checkbox"/> cisbp__M4607<br>Description: FOS[gene ID: "ENSG00000170345" species: "Homo sapiens" TF status: "direct" TF family: "bZIP" DBDs: "bZIP_1"]; Fos[gene ID: "ENSMUSG00000021250" species: "Mus musculus" TF status: "inferred" TF family: "bZIP" DBDs: "bZIP_1"]; Fosb[gene ID: "ENSMUSG00000003545" species: "Mus musculus" TF status: "inferred" TF family: "bZIP" DBDs: "bZIP_1"]<br>Possible TFs: FOS | 4.18468 |    |    | <a href="#">link</a> | <a href="#">link</a>     | PWMs        |
| 55 | <input type="checkbox"/> hocomoco__FOSL2_MOUSE.H11MO.0.A<br>Description: FOSL2_MOUSE<br>Possible TFs: FOSL2                                                                                                                                                                                                                                                                                                                    | 4.18405 |    |    | <a href="#">link</a> | <a href="#">link</a>     | PWMs        |
| 56 | <input type="checkbox"/> cisbp__M5050<br>Description: Jra[gene ID: "FBgn0001291" species: "Drosophila melanogaster" TF status: "direct" TF family: "bZIP" DBDs: "bZIP_1"]<br>Possible TFs: JUNB, JUN, JUND                                                                                                                                                                                                                     | 4.17876 |    |    | <a href="#">link</a> | <a href="#">link</a>     | PWMs        |
| 57 | <input type="checkbox"/> hocomoco__JUND_HUMAN.H11MO.0.A<br>Description: JUND_HUMAN<br>Possible TFs: JUND                                                                                                                                                                                                                                                                                                                       | 4.17477 |    |   | <a href="#">link</a> | <a href="#">link</a>     | PWMs        |
| 58 | <input type="checkbox"/> hocomoco__JUN_MOUSE.H11MO.0.A<br>Description: JUN_MOUSE<br>Possible TFs: JUN                                                                                                                                                                                                                                                                                                                          | 4.17054 |  |  | <a href="#">link</a> | <a href="#">link</a>     | PWMs        |
| 59 | <input type="checkbox"/> jaspar__MA0489.1<br>Description: JUN(var.2)<br>Possible TFs: JUN                                                                                                                                                                                                                                                                                                                                      | 4.15691 |  |  | <a href="#">link</a> | <a href="#">link</a>     | PWMs        |
| 60 | <input type="checkbox"/> swissregulon__hs__FOS_FOS_B_L1__JUN_B_D_.p2<br>Description: hs__FOS_FOS{B,L1}_JUN{B,D}.p2<br>Possible TFs: FOSB, JUNB, FOSL1, JUND, FOS                                                                                                                                                                                                                                                               | 4.14124 |  |  | <a href="#">link</a> | <a href="#">link</a>     | PWMs        |
| 61 | <input type="checkbox"/> hocomoco__FOSB_HUMAN.H11MO.0.A<br>Description: FOSB_HUMAN<br>Possible TFs: FOSB                                                                                                                                                                                                                                                                                                                       | 4.13588 |  |  | <a href="#">link</a> | <a href="#">link</a>     | PWMs        |
| 62 | <input type="checkbox"/> cisbp__M2292<br>Description: JUND[gene ID: "ENSG00000130522" species: "Homo sapiens" TF status: "direct" TF family: "bZIP" DBDs: "bZIP_1"]<br>Possible TFs: JUND                                                                                                                                                                                                                                      | 4.13396 |  |  | <a href="#">link</a> | <a href="#">link</a>     | PWMs        |
| 63 | <input type="checkbox"/> ENCF001SQN<br>Description: DNase-seq on human HA-sp                                                                                                                                                                                                                                                                                                                                                   | 4.12734 |                                                                                     |  | <a href="#">link</a> | <a href="#">link</a>     | DHS & FAIRE |
| 64 | <input type="checkbox"/> cisbp__M2290<br>Description: JUN[gene ID: "ENSG00000177606" species: "Homo sapiens" TF status: "direct" TF family: "bZIP" DBDs: "bZIP_1"]<br>Possible TFs: JUN                                                                                                                                                                                                                                        | 4.12587 |  |  | <a href="#">link</a> | <a href="#">link</a>     | PWMs        |

|                   |                                                                                                                                                                                                                                                                                                                                                                                                                                                                                                                                                                        |                                               |      |                |                      |                      |             |  |
|-------------------|------------------------------------------------------------------------------------------------------------------------------------------------------------------------------------------------------------------------------------------------------------------------------------------------------------------------------------------------------------------------------------------------------------------------------------------------------------------------------------------------------------------------------------------------------------------------|-----------------------------------------------|------|----------------|----------------------|----------------------|-------------|--|
| 12/22/21, 1:56 PM |                                                                                                                                                                                                                                                                                                                                                                                                                                                                                                                                                                        | i-cisTarget: results for Butyrate-DARs-cattle |      |                |                      |                      | All         |  |
| #                 | Feature                                                                                                                                                                                                                                                                                                                                                                                                                                                                                                                                                                | NES                                           | Logo | Recovery Curve | Candidate targets    | regions in top 20000 | Database    |  |
| 65                | <div><input type="checkbox"/> homer__DATGASTCAT_BATF</div> <div>Description: BATF(bZIP)/Th17-BATF-ChIP-Seq(GSE39756)/Homer</div> <div>Possible TFs: BATF</div>                                                                                                                                                                                                                                                                                                                                                                                                         | 4.12486                                       |      |                | <a href="#">link</a> | <a href="#">link</a> | PWMs        |  |
| 66                | <div><input type="checkbox"/> ENCF001WHB</div> <div>Description: DNase-seq on human HA-sp</div>                                                                                                                                                                                                                                                                                                                                                                                                                                                                        | 4.12463                                       |      |                | <a href="#">link</a> | <a href="#">link</a> | DHS & FAIRE |  |
| 67                | <div><input type="checkbox"/> dbcorrd__STAT3__ENCSR000DOU_1__m2</div> <div>Description: STAT3 (ENCSR000DOU-1, motif 2)</div> <div>Possible TFs: STAT3</div>                                                                                                                                                                                                                                                                                                                                                                                                            | 4.12427                                       |      |                | <a href="#">link</a> | <a href="#">link</a> | PWMs        |  |
| 68                | <div><input type="checkbox"/> dbcorrd__FOS__ENCSR000EZE_1__m1</div> <div>Description: FOS (ENCSR000EZE-1, motif 1)</div> <div>Possible TFs: FOS</div>                                                                                                                                                                                                                                                                                                                                                                                                                  | 4.11671                                       |      |                | <a href="#">link</a> | <a href="#">link</a> | PWMs        |  |
| 69                | <div><input type="checkbox"/> jasper__MA0491.1</div> <div>Description: JUND</div> <div>Possible TFs: JUND</div>                                                                                                                                                                                                                                                                                                                                                                                                                                                        | 4.11409                                       |      |                | <a href="#">link</a> | <a href="#">link</a> | PWMs        |  |
| 70                | <div><input type="checkbox"/> cisbp__M2279</div> <div>Description: FOSL1[<i>gene ID</i>: "ENSG00000175592" <i>species</i>: "Homo sapiens" <i>TF status</i>: "direct" <i>TF family</i>: "bZIP" <i>DBDs</i>: "bZIP_1"]; Fos[<i>gene ID</i>: "ENSMUSG00000021250" <i>species</i>: "Mus musculus" <i>TF status</i>: "inferred" <i>TF family</i>: "bZIP" <i>DBDs</i>: "bZIP_1"]; Fosb[<i>gene ID</i>: "ENSMUSG00000003545" <i>species</i>: "Mus musculus" <i>TF status</i>: "inferred" <i>TF family</i>: "bZIP" <i>DBDs</i>: "bZIP_1"]</div> <div>Possible TFs: FOSL1</div> | 4.11047                                       |      |                | <a href="#">link</a> | <a href="#">link</a> | PWMs        |  |
| 71                | <div><input type="checkbox"/> yetfasco__YEL009C_1363</div> <div>Description: YEL009C_1363</div>                                                                                                                                                                                                                                                                                                                                                                                                                                                                        | 4.10214                                       |      |                | <a href="#">link</a> | <a href="#">link</a> | PWMs        |  |
| 72                | <div><input type="checkbox"/> taipale_cyt_meth__JDP2_NRTGASTCAYN_FL_meth</div> <div>Description: JDP2 [bZIP, CpG-meth]</div> <div>Possible TFs: JDP2</div>                                                                                                                                                                                                                                                                                                                                                                                                             | 4.09189                                       |      |                | <a href="#">link</a> | <a href="#">link</a> | PWMs        |  |
| 73                | <div><input type="checkbox"/> transfac_pro__M08929</div> <div>Description: V\$JUNDFRA1_01: JUND:FRA-1</div> <div>Possible TFs: FOSL1</div>                                                                                                                                                                                                                                                                                                                                                                                                                             | 4.08358                                       |      |                | <a href="#">link</a> | <a href="#">link</a> | PWMs        |  |
| 74                | <div><input type="checkbox"/> hocomoco__JUN_HUMAN.H11MO.0.A</div> <div>Description: JUN_HUMAN</div> <div>Possible TFs: JUN</div>                                                                                                                                                                                                                                                                                                                                                                                                                                       | 4.08091                                       |      |                | <a href="#">link</a> | <a href="#">link</a> | PWMs        |  |
| 75                | <div><input type="checkbox"/> jasper__MA0477.1</div> <div>Description: FOSL1</div> <div>Possible TFs: FOSL1</div>                                                                                                                                                                                                                                                                                                                                                                                                                                                      | 4.07451                                       |      |                | <a href="#">link</a> | <a href="#">link</a> | PWMs        |  |
| 76                | <div><input type="checkbox"/> swissregulon__hs__BACH2.p2</div> <div>Description: hs__BACH2.p2</div> <div>Possible TFs: BACH2</div>                                                                                                                                                                                                                                                                                                                                                                                                                                     | 4.07390                                       |      |                | <a href="#">link</a> | <a href="#">link</a> | PWMs        |  |

| #  | Feature                                                                                                                                                                                                                     | NES     | Logo | Recovery Curve | Candidate targets    | All regions in top 20000 | Database |
|----|-----------------------------------------------------------------------------------------------------------------------------------------------------------------------------------------------------------------------------|---------|------|----------------|----------------------|--------------------------|----------|
| 77 | <div><input type="checkbox"/> dbcorrdB__MYC__ENCSR000DOM_1__m2</div> <div>Description: MYC (ENCSR000DOM-1, motif 2)</div> <div>Possible TFs: MYC</div>                                                                      | 4.07318 |      |                | <a href="#">link</a> | <a href="#">link</a>     | PWMs     |
| 78 | <div><input type="checkbox"/> taipale_tf_pairs__BACH1_ATGACTCAT_HT</div> <div>Description: BACH1 [bZIP]</div> <div>Possible TFs: BACH1</div>                                                                                | 4.06108 |      |                | <a href="#">link</a> | <a href="#">link</a>     | PWMs     |
| 79 | <div><input type="checkbox"/> cisbp__M4506</div> <div>Description: JUND[<i>gene ID: "ENSG00000130522" species: "Homo sapiens"</i> TF status: "direct" TF family: "bZIP" DBDs: "bZIP_1"]</div> <div>Possible TFs: JUND</div> | 4.05024 |      |                | <a href="#">link</a> | <a href="#">link</a>     | PWMs     |
| 80 | <div><input type="checkbox"/> transfac_pro__M08926</div> <div>Description: V\$JUNB_02: JUNB</div> <div>Possible TFs: JUNB</div>                                                                                             | 4.04742 |      |                | <a href="#">link</a> | <a href="#">link</a>     | PWMs     |
| 81 | <div><input type="checkbox"/> dbcorrdB__SMARCC1__ENCSR000EDM_1__m1</div> <div>Description: SMARCC1 (ENCSR000EDM-1, motif 1)</div> <div>Possible TFs: SMARCC1</div>                                                          | 4.04168 |      |                | <a href="#">link</a> | <a href="#">link</a>     | PWMs     |
| 82 | <div><input type="checkbox"/> dbcorrdB__eGFP-JUNB__ENCSR000DJY_1__m1</div> <div>Description: eGFP-JUNB (ENCSR000DJY-1, motif 1)</div>                                                                                       | 4.04075 |      |                | <a href="#">link</a> | <a href="#">link</a>     | PWMs     |
| 83 | <div><input type="checkbox"/> taipale_cyt_meth__NFE2_NATGASTCATN_eDBD_meth_repr</div> <div>Description: NFE2 [bZIP, CpG-meth]</div> <div>Possible TFs: NFE2</div>                                                           | 4.03805 |      |                | <a href="#">link</a> | <a href="#">link</a>     | PWMs     |
| 84 | <div><input type="checkbox"/> dbcorrdB__BCL3__ENCSR000BQH_1__m2</div> <div>Description: BCL3 (ENCSR000BQH-1, motif 2)</div> <div>Possible TFs: BCL3</div>                                                                   | 4.03500 |      |                | <a href="#">link</a> | <a href="#">link</a>     | PWMs     |
| 85 | <div><input type="checkbox"/> dbcorrdB__JUND__ENCSR000BGK_1__m1</div> <div>Description: JUND (ENCSR000BGK-1, motif 1)</div> <div>Possible TFs: JUND</div>                                                                   | 4.03351 |      |                | <a href="#">link</a> | <a href="#">link</a>     | PWMs     |
| 86 | <div><input type="checkbox"/> dbcorrdB__STAT3__ENCSR000EDC_1__m1</div> <div>Description: STAT3 (ENCSR000EDC-1, motif 1)</div> <div>Possible TFs: STAT3</div>                                                                | 4.01534 |      |                | <a href="#">link</a> | <a href="#">link</a>     | PWMs     |
| 87 | <div><input type="checkbox"/> cisbp__M4608</div> <div>Description: JUN[<i>gene ID: "ENSG00000177606" species: "Homo sapiens"</i> TF status: "direct" TF family: "bZIP" DBDs: "bZIP_1"]</div> <div>Possible TFs: JUN</div>   | 4.01147 |      |                | <a href="#">link</a> | <a href="#">link</a>     | PWMs     |
| 88 | <div><input type="checkbox"/> dbcorrdB__EP300__ENCSR000BPW_1__m1</div> <div>Description: EP300 (ENCSR000BPW-1, motif 1)</div> <div>Possible TFs: EP300</div>                                                                | 4.00327 |      |                | <a href="#">link</a> | <a href="#">link</a>     | PWMs     |
| 89 | <div><input type="checkbox"/> cisbp__M4591</div> <div>Description: JUN[<i>gene ID: "ENSG00000177606" species: "Homo sapiens"</i> TF status: "direct" TF family: "bZIP" DBDs: "bZIP_1"]</div> <div>Possible TFs: JUN</div>   | 3.99247 |      |                | <a href="#">link</a> | <a href="#">link</a>     | PWMs     |

| #  | Feature                                                                                                                                                                                                                                                                                                                                                                                                                                                                                                                                                                                                                                                 | NES     | Logo                                                                                | Recovery Curve                                                                       | All                  |                      |          |
|----|---------------------------------------------------------------------------------------------------------------------------------------------------------------------------------------------------------------------------------------------------------------------------------------------------------------------------------------------------------------------------------------------------------------------------------------------------------------------------------------------------------------------------------------------------------------------------------------------------------------------------------------------------------|---------|-------------------------------------------------------------------------------------|--------------------------------------------------------------------------------------|----------------------|----------------------|----------|
|    |                                                                                                                                                                                                                                                                                                                                                                                                                                                                                                                                                                                                                                                         |         |                                                                                     |                                                                                      | Candidate targets    | regions in top 20000 | Database |
| 90 | <input type="checkbox"/> cisbp_M4530<br>Description: FOS[ <i>gene ID: "ENSG00000170345"</i> species: "Homo sapiens" TF status: "direct" TF family: "bZIP" DBDs: "bZIP_1"]; Fos[ <i>gene ID: "ENSMUSG00000021250"</i> species: "Mus musculus" TF status: "inferred" TF family: "bZIP" DBDs: "bZIP_1"]; Fosb[ <i>gene ID: "ENSMUSG00000003545"</i> species: "Mus musculus" TF status: "inferred" TF family: "bZIP" DBDs: "bZIP_1"]<br>Possible TFs: FOS                                                                                                                                                                                                   | 3.98794 |    |    | <a href="#">link</a> | <a href="#">link</a> | PWMs     |
| 91 | <input type="checkbox"/> transfac_pro_M08934<br>Description: V\$JUND_06: JUND<br>Possible TFs: JUND                                                                                                                                                                                                                                                                                                                                                                                                                                                                                                                                                     | 3.98466 |    |    | <a href="#">link</a> | <a href="#">link</a> | PWMs     |
| 92 | <input type="checkbox"/> dbcorrdB_STAT3_ENCSR000DPB_1_m2<br>Description: STAT3 (ENCSR000DPB-1, motif 2)<br>Possible TFs: STAT3                                                                                                                                                                                                                                                                                                                                                                                                                                                                                                                          | 3.97824 |    |    | <a href="#">link</a> | <a href="#">link</a> | PWMs     |
| 93 | <input type="checkbox"/> transfac_pro_M04693<br>Description: V\$FOS_02: c-Fos<br>Possible TFs: FOS                                                                                                                                                                                                                                                                                                                                                                                                                                                                                                                                                      | 3.97472 |    |    | <a href="#">link</a> | <a href="#">link</a> | PWMs     |
| 94 | <input type="checkbox"/> dbcorrdB_JUN_ENCSR000EZ_1_m1<br>Description: JUN (ENCSR000EZ-1, motif 1)<br>Possible TFs: JUN                                                                                                                                                                                                                                                                                                                                                                                                                                                                                                                                  | 3.96928 |    |    | <a href="#">link</a> | <a href="#">link</a> | PWMs     |
| 95 | <input type="checkbox"/> dbcorrdB_JUND_ENCSR000EIB_1_m1<br>Description: JUND (ENCSR000EIB-1, motif 1)<br>Possible TFs: JUND                                                                                                                                                                                                                                                                                                                                                                                                                                                                                                                             | 3.96493 |  |  | <a href="#">link</a> | <a href="#">link</a> | PWMs     |
| 96 | <input type="checkbox"/> yetfasco_YIL056W_2091<br>Description: YIL056W_2091                                                                                                                                                                                                                                                                                                                                                                                                                                                                                                                                                                             | 3.95897 |  |  | <a href="#">link</a> | <a href="#">link</a> | PWMs     |
| 97 | <input type="checkbox"/> cisbp_M4526<br>Description: SMARCC1[ <i>gene ID: "ENSG00000173473"</i> species: "Homo sapiens" TF status: "direct" TF family: "Myb/SANT" DBDs: "Myb_DNA-binding"]; Smarcc1[ <i>gene ID: "ENSMUSG00000032481"</i> species: "Mus musculus" TF status: "inferred" TF family: "Myb/SANT" DBDs: "Myb_DNA-binding"]; Smarcc2[ <i>gene ID: "ENSMUSG00000025369"</i> species: "Mus musculus" TF status: "inferred" TF family: "Myb/SANT" DBDs: "Myb_DNA-binding"]; mor[ <i>gene ID: "FBgn0002783"</i> species: "Drosophila melanogaster" TF status: "inferred" TF family: "Myb/SANT" DBDs: "Myb_DNA-binding"]<br>Possible TFs: SMARCC1 | 3.93696 |  |  | <a href="#">link</a> | <a href="#">link</a> | PWMs     |
| 98 | <input type="checkbox"/> cisbp_M6317<br>Description: JUNB[ <i>gene ID: "ENSG00000171223"</i> species: "Homo sapiens" TF status: "direct" TF family: "bZIP" DBDs: "bZIP_1"]<br>Possible TFs: JUNB                                                                                                                                                                                                                                                                                                                                                                                                                                                        | 3.93349 |  |  | <a href="#">link</a> | <a href="#">link</a> | PWMs     |
| 99 | <input type="checkbox"/> neph_UW.Motif.0001<br>Description: atgactca                                                                                                                                                                                                                                                                                                                                                                                                                                                                                                                                                                                    | 3.91833 |  |  | <a href="#">link</a> | <a href="#">link</a> | PWMs     |



| #   | Feature                                                                                                                                                                                      | NES     | Logo                                                                                | Recovery Curve                                                                       | All                  |                      |          |
|-----|----------------------------------------------------------------------------------------------------------------------------------------------------------------------------------------------|---------|-------------------------------------------------------------------------------------|--------------------------------------------------------------------------------------|----------------------|----------------------|----------|
|     |                                                                                                                                                                                              |         |                                                                                     |                                                                                      | Candidate targets    | regions in top 20000 | Database |
| 100 | <input type="checkbox"/> transfac_pro_M08914<br>Description: V\$FRA2_01: FRA-2<br>Possible TFs: FOSL2                                                                                        | 3.89336 |    |    | <a href="#">link</a> | <a href="#">link</a> | PWMs     |
| 101 | <input type="checkbox"/> transfac_pro_M08944<br>Description: V\$JUNBFOS_02: JUNB:C-FOS<br>Possible TFs: JUNB                                                                                 | 3.86173 |    |    | <a href="#">link</a> | <a href="#">link</a> | PWMs     |
| 102 | <input type="checkbox"/> dbcorrd_b_eGFP-FOS__ENCSR000DKB_1__m1<br>Description: eGFP-FOS (ENCSR000DKB-1, motif 1)                                                                             | 3.85448 |    |    | <a href="#">link</a> | <a href="#">link</a> | PWMs     |
| 103 | <input type="checkbox"/> transfac_pro_M01267<br>Description: V\$FRA1_Q5: Fra-1<br>Possible TFs: FOSL1                                                                                        | 3.85329 |    |    | <a href="#">link</a> | <a href="#">link</a> | PWMs     |
| 104 | <input type="checkbox"/> taipale_cyt_meth__NFE2_NATGASTCATN_eDBD<br>Description: NFE2 [bZIP]<br>Possible TFs: NFE2                                                                           | 3.85158 |    |    | <a href="#">link</a> | <a href="#">link</a> | PWMs     |
| 105 | <input type="checkbox"/> cisbp_M4625<br>Description: JUND[<br>gene ID: "ENSG00000130522" species: "Homo sapiens" TF status: "direct" TF family: "bZIP" DBDs: "bZIP_1"]<br>Possible TFs: JUND | 3.84940 |    |    | <a href="#">link</a> | <a href="#">link</a> | PWMs     |
| 106 | <input type="checkbox"/> jaspar_MA0303.1<br>Description: GCN4                                                                                                                                | 3.84804 |  |  | <a href="#">link</a> | <a href="#">link</a> | PWMs     |
| 107 | <input type="checkbox"/> hocomoco__ATF3_MOUSE.H11MO.0.A<br>Description: ATF3_MOUSE<br>Possible TFs: ATF3                                                                                     | 3.84590 |  |  | <a href="#">link</a> | <a href="#">link</a> | PWMs     |
| 108 | <input type="checkbox"/> dbcorrd_b_FOSL1__ENCSR000BMV_1__m1<br>Description: FOSL1 (ENCSR000BMV-1, motif 1)<br>Possible TFs: FOSL1                                                            | 3.83830 |  |  | <a href="#">link</a> | <a href="#">link</a> | PWMs     |
| 109 | <input type="checkbox"/> cisbp_M4684<br>Description: ATF3[<br>gene ID: "ENSG00000162772" species: "Homo sapiens" TF status: "direct" TF family: "bZIP" DBDs: "bZIP_1"]<br>Possible TFs: ATF3 | 3.83542 |  |  | <a href="#">link</a> | <a href="#">link</a> | PWMs     |
| 110 | <input type="checkbox"/> transfac_pro_M01555<br>Description: F\$GCN4_02: Gcn4p                                                                                                               | 3.82646 |  |  | <a href="#">link</a> | <a href="#">link</a> | PWMs     |
| 111 | <input type="checkbox"/> dbcorrd_b_JUN__ENCSR000EJT_1__m1<br>Description: JUN (ENCSR000EJT-1, motif 1)<br>Possible TFs: JUN                                                                  | 3.82502 |  |  | <a href="#">link</a> | <a href="#">link</a> | PWMs     |
| 112 | <input type="checkbox"/> transfac_public_M00199<br>Description: V\$AP1_C: AP-1<br>Possible TFs: JUN, FOS                                                                                     | 3.81982 |  |  | <a href="#">link</a> | <a href="#">link</a> | PWMs     |

| #   | Feature                                                                                                                                                                                           | NES     | Logo | Recovery Curve | Candidate targets    | All regions in top 20000 | Database |
|-----|---------------------------------------------------------------------------------------------------------------------------------------------------------------------------------------------------|---------|------|----------------|----------------------|--------------------------|----------|
| 113 | <input type="checkbox"/> cisbp__M2108<br>Description: GCN4[ <i>gene ID: "YEL009C" species: "Saccharomyces cerevisiae"</i> TF status: "direct" TF family: "bZIP" DBDs: "bZIP_1"]                   | 3.81249 |      |                | <a href="#">link</a> | <a href="#">link</a>     | PWMS     |
| 114 | <input type="checkbox"/> dbcorrd__CEBPB__ENCSR000EFM_1__m2<br>Description: CEBPB (ENCSR000EFM-1, motif 2)<br>Possible TFs: CEBPB                                                                  | 3.80631 |      |                | <a href="#">link</a> | <a href="#">link</a>     | PWMS     |
| 115 | <input type="checkbox"/> dbcorrd__JUN__ENCSR000FAH_1__m1<br>Description: JUN (ENCSR000FAH-1, motif 1)<br>Possible TFs: JUN                                                                        | 3.79810 |      |                | <a href="#">link</a> | <a href="#">link</a>     | PWMS     |
| 116 | <input type="checkbox"/> transfac_pro__M03866<br>Description: V\$CFOSCJUN_Q5: c-Fos:c-Jun<br>Possible TFs: JUN, FOS                                                                               | 3.79684 |      |                | <a href="#">link</a> | <a href="#">link</a>     | PWMS     |
| 117 | <input type="checkbox"/> dbcorrd__EP300__ENCSR000ECV_1__m1<br>Description: EP300 (ENCSR000ECV-1, motif 1)<br>Possible TFs: EP300                                                                  | 3.78956 |      |                | <a href="#">link</a> | <a href="#">link</a>     | PWMS     |
| 118 | <input type="checkbox"/> homer__NATGASTCABNN_FosI2<br>Description: FosI2(bZIP)/3T3L1-FosI2-ChIP-Seq(GSE56872)/Homer<br>Possible TFs: FOSL2                                                        | 3.78040 |      |                | <a href="#">link</a> | <a href="#">link</a>     | PWMS     |
| 119 | <input type="checkbox"/> hocomoco__JUNB_HUMAN.H11MO.0.A<br>Description: JUNB_HUMAN<br>Possible TFs: JUNB                                                                                          | 3.77873 |      |                | <a href="#">link</a> | <a href="#">link</a>     | PWMS     |
| 120 | <input type="checkbox"/> taipale__JDP2_full_ATGASTCAT<br>Description: JDP2 dimeric bZIP full<br>Possible TFs: JDP2                                                                                | 3.77770 |      |                | <a href="#">link</a> | <a href="#">link</a>     | PWMS     |
| 121 | <input type="checkbox"/> taipale_cyt_meth__JUN_NATGACTCATN_FL_meth<br>Description: JUN [bZIP, CpG-meth]<br>Possible TFs: JUN                                                                      | 3.77460 |      |                | <a href="#">link</a> | <a href="#">link</a>     | PWMS     |
| 122 | <input type="checkbox"/> transfac_public__M00517<br>Description: V\$AP1_01: AP-1<br>Possible TFs: FOS, FOSB, JUNB, JUN, JUND, FOSL1                                                               | 3.73107 |      |                | <a href="#">link</a> | <a href="#">link</a>     | PWMS     |
| 123 | <input type="checkbox"/> yetfasco__YER064C_2094<br>Description: YER064C_2094                                                                                                                      | 3.72835 |      |                | <a href="#">link</a> | <a href="#">link</a>     | PWMS     |
| 124 | <input type="checkbox"/> cisbp__M5589<br>Description: JDP2[ <i>gene ID: "ENSG00000140044" species: "Homo sapiens"</i> TF status: "direct" TF family: "bZIP" DBDs: "bZIP_1"]<br>Possible TFs: JDP2 | 3.72131 |      |                | <a href="#">link</a> | <a href="#">link</a>     | PWMS     |
| 125 | <input type="checkbox"/> dbcorrd__JUN__ENCSR000EFS_1__m1<br>Description: JUN (ENCSR000EFS-1, motif 1)<br>Possible TFs: JUN                                                                        | 3.72089 |      |                | <a href="#">link</a> | <a href="#">link</a>     | PWMS     |

| #   | Feature                                                                                                                                                                                                                                                                                                                                                                                                                                                                                                                                                                                                                                                                     | NES     | Logo                                                                                | Recovery Curve                                                                       | Candidate targets    | All regions in top 20000 | Database |
|-----|-----------------------------------------------------------------------------------------------------------------------------------------------------------------------------------------------------------------------------------------------------------------------------------------------------------------------------------------------------------------------------------------------------------------------------------------------------------------------------------------------------------------------------------------------------------------------------------------------------------------------------------------------------------------------------|---------|-------------------------------------------------------------------------------------|--------------------------------------------------------------------------------------|----------------------|--------------------------|----------|
| 126 | <div><input type="checkbox"/> taipale__JDP2_DBD_ATGASTCAT</div> <div>Description: JDP2 dimeric bZIP DBD</div> <div>Possible TFs: JDP2</div>                                                                                                                                                                                                                                                                                                                                                                                                                                                                                                                                 | 3.72042 | 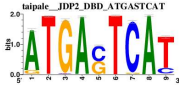   |    | <a href="#">link</a> | <a href="#">link</a>     | PWMs     |
| 127 | <div><input type="checkbox"/> dbcorrd__JUN_ENCSR000EZW_1__m1</div> <div>Description: JUN (ENCSR000EZW-1, motif 1)</div> <div>Possible TFs: JUN</div>                                                                                                                                                                                                                                                                                                                                                                                                                                                                                                                        | 3.71767 |    |    | <a href="#">link</a> | <a href="#">link</a>     | PWMs     |
| 128 | <div><input type="checkbox"/> transfac_pro__M07400</div> <div>Description: F\$IDI4_01: IDI4</div>                                                                                                                                                                                                                                                                                                                                                                                                                                                                                                                                                                           | 3.70672 |    |    | <a href="#">link</a> | <a href="#">link</a>     | PWMs     |
| 129 | <div><input type="checkbox"/> cisbp__M6467</div> <div>Description: SMARCC1[<br/>gene ID: "ENSG00000173473"<br/>species: "Homo sapiens" TF status: "direct" TF family: "Myb/SANT" DBDs: "Myb_DNA-binding"]; Smarcc1[<br/>gene ID: "ENSMUSG00000032481" species: "Mus musculus" TF status: "inferred" TF family: "Myb/SANT" DBDs: "Myb_DNA-binding"]; Smarcc2[<br/>gene ID: "ENSMUSG00000025369" species: "Mus musculus" TF status: "inferred" TF family: "Myb/SANT" DBDs: "Myb_DNA-binding"]; mor[<br/>gene ID: "FBgn0002783" species: "Drosophila melanogaster" TF status: "inferred" TF family: "Myb/SANT" DBDs: "Myb_DNA-binding"]</div> <div>Possible TFs: SMARCC1</div> | 3.70644 |    |    | <a href="#">link</a> | <a href="#">link</a>     | PWMs     |
| 130 | <div><input type="checkbox"/> cisbp__M0542</div> <div>Description: YPR015C[<br/>gene ID: "YPR015C" species: "Saccharomyces cerevisiae" TF status: "direct" TF family: "C2H2 ZF" DBDs: "zf-C2H2"]</div>                                                                                                                                                                                                                                                                                                                                                                                                                                                                      | 3.69489 |   |   | <a href="#">link</a> | <a href="#">link</a>     | PWMs     |
| 131 | <div><input type="checkbox"/> dbcorrd__RCOR1_ENCSR000ECM_1__m1</div> <div>Description: RCOR1 (ENCSR000ECM-1, motif 1)</div> <div>Possible TFs: RCOR1</div>                                                                                                                                                                                                                                                                                                                                                                                                                                                                                                                  | 3.69369 |  |  | <a href="#">link</a> | <a href="#">link</a>     | PWMs     |
| 132 | <div><input type="checkbox"/> taipale_cyt_meth__JUN_NATGASTCATN_FL_meth</div> <div>Description: JUN [bZIP, CpG-meth]</div> <div>Possible TFs: JUN</div>                                                                                                                                                                                                                                                                                                                                                                                                                                                                                                                     | 3.68149 |  |  | <a href="#">link</a> | <a href="#">link</a>     | PWMs     |
| 133 | <div><input type="checkbox"/> taipale_cyt_meth__JUNB_NATGASTCAYN_eDBD_meth</div> <div>Description: JUNB [bZIP, CpG-meth]</div> <div>Possible TFs: JUNB</div>                                                                                                                                                                                                                                                                                                                                                                                                                                                                                                                | 3.67249 |  |  | <a href="#">link</a> | <a href="#">link</a>     | PWMs     |
| 134 | <div><input type="checkbox"/> dbcorrd__TCF7L2_ENCSR000EUV_1__m2</div> <div>Description: TCF7L2 (ENCSR000EUV-1, motif 2)</div> <div>Possible TFs: TCF7L2</div>                                                                                                                                                                                                                                                                                                                                                                                                                                                                                                               | 3.67124 |  |  | <a href="#">link</a> | <a href="#">link</a>     | PWMs     |
| 135 | <div><input type="checkbox"/> transfac_pro__M08946</div> <div>Description: V\$FOS_08: C-FOS</div> <div>Possible TFs: FOS</div>                                                                                                                                                                                                                                                                                                                                                                                                                                                                                                                                              | 3.66936 |  |  | <a href="#">link</a> | <a href="#">link</a>     | PWMs     |

|     |                                                                                                                                                                                                                                                                                                                                                                                                                                                                         |         |                                                                                     |                                                                                      | All                  |                      |          |
|-----|-------------------------------------------------------------------------------------------------------------------------------------------------------------------------------------------------------------------------------------------------------------------------------------------------------------------------------------------------------------------------------------------------------------------------------------------------------------------------|---------|-------------------------------------------------------------------------------------|--------------------------------------------------------------------------------------|----------------------|----------------------|----------|
| #   | Feature                                                                                                                                                                                                                                                                                                                                                                                                                                                                 | NES     | Logo                                                                                | Recovery Curve                                                                       | Candidate targets    | regions in top 20000 | Database |
| 136 | <div><input type="checkbox"/> cisbp__M6158</div> <div>Description: BATF[<i>gene ID: "ENSG00000156127"</i> species: "Homo sapiens" TF status: "direct" TF family: "bZIP" DBDs: "bZIP_1"]; Batf3[<i>gene ID: "ENSMUSG00000026630"</i> species: "Mus musculus" TF status: "inferred" TF family: "bZIP" DBDs: "bZIP_1"]; Batf[<i>gene ID: "ENSMUSG00000034266"</i> species: "Mus musculus" TF status: "inferred" TF family: "bZIP" DBDs: "bZIP_1"] Possible TFs: BATF</div> | 3.65907 | 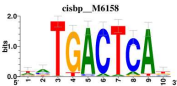   |    | <a href="#">link</a> | <a href="#">link</a> | PWMs     |
|     |                                                                                                                                                                                                                                                                                                                                                                                                                                                                         |         |                                                                                     |                                                                                      |                      |                      |          |
| 137 | <div><input type="checkbox"/> transfac_pro__M03870</div> <div>Description: V\$FRA2_Q4_01: Fra-2 Possible TFs: FOSL2</div>                                                                                                                                                                                                                                                                                                                                               | 3.65186 |    |    | <a href="#">link</a> | <a href="#">link</a> | PWMs     |
|     |                                                                                                                                                                                                                                                                                                                                                                                                                                                                         |         |                                                                                     |                                                                                      |                      |                      |          |
| 138 | <div><input type="checkbox"/> taipale__Jdp2_DBD_ATGASTCAT_repr</div> <div>Description: Jdp2 dimeric bZIP DBD Possible TFs: JDP2</div>                                                                                                                                                                                                                                                                                                                                   | 3.64944 |    |    | <a href="#">link</a> | <a href="#">link</a> | PWMs     |
|     |                                                                                                                                                                                                                                                                                                                                                                                                                                                                         |         |                                                                                     |                                                                                      |                      |                      |          |
| 139 | <div><input type="checkbox"/> cisbp__M5587</div> <div>Description: JDP2[<i>gene ID: "ENSG00000140044"</i> species: "Homo sapiens" TF status: "direct" TF family: "bZIP" DBDs: "bZIP_1"] Possible TFs: JDP2</div>                                                                                                                                                                                                                                                        | 3.64583 |    |    | <a href="#">link</a> | <a href="#">link</a> | PWMs     |
|     |                                                                                                                                                                                                                                                                                                                                                                                                                                                                         |         |                                                                                     |                                                                                      |                      |                      |          |
| 140 | <div><input type="checkbox"/> cisbp__M6228</div> <div>Description: FOSB[<i>gene ID: "ENSG00000125740"</i> species: "Homo sapiens" TF status: "direct" TF family: "bZIP" DBDs: "bZIP_1"]; Fos[<i>gene ID: "ENSMUSG00000021250"</i> species: "Mus musculus" TF status: "inferred" TF family: "bZIP" DBDs: "bZIP_1"]; Fosb[<i>gene ID: "ENSMUSG0000003545"</i> species: "Mus musculus" TF status: "inferred" TF family: "bZIP" DBDs: "bZIP_1"] Possible TFs: FOSB</div>    | 3.64300 |   |   | <a href="#">link</a> | <a href="#">link</a> | PWMs     |
|     |                                                                                                                                                                                                                                                                                                                                                                                                                                                                         |         |                                                                                     |                                                                                      |                      |                      |          |
| 141 | <div><input type="checkbox"/> transfac_pro__M02095</div> <div>Description: V\$FRA1_Q6: Fra-1 Possible TFs: FOSL1</div>                                                                                                                                                                                                                                                                                                                                                  | 3.63363 |  |  | <a href="#">link</a> | <a href="#">link</a> | PWMs     |
|     |                                                                                                                                                                                                                                                                                                                                                                                                                                                                         |         |                                                                                     |                                                                                      |                      |                      |          |
| 142 | <div><input type="checkbox"/> transfac_pro__M07685</div> <div>Description: I\$KAY_Q1: kay Possible TFs: FOSB, FOSL2, FOSL1, FOS</div>                                                                                                                                                                                                                                                                                                                                   | 3.62974 |  |  | <a href="#">link</a> | <a href="#">link</a> | PWMs     |
|     |                                                                                                                                                                                                                                                                                                                                                                                                                                                                         |         |                                                                                     |                                                                                      |                      |                      |          |
| 143 | <div><input type="checkbox"/> cisbp__M4541</div> <div>Description: JUND[<i>gene ID: "ENSG00000130522"</i> species: "Homo sapiens" TF status: "direct" TF family: "bZIP" DBDs: "bZIP_1"] Possible TFs: JUND</div>                                                                                                                                                                                                                                                        | 3.62749 |  |  | <a href="#">link</a> | <a href="#">link</a> | PWMs     |
|     |                                                                                                                                                                                                                                                                                                                                                                                                                                                                         |         |                                                                                     |                                                                                      |                      |                      |          |
| 144 | <div><input type="checkbox"/> transfac_pro__M03551</div> <div>Description: V\$JUNB_Q6: JunB Possible TFs: JUNB</div>                                                                                                                                                                                                                                                                                                                                                    | 3.59082 |  |  | <a href="#">link</a> | <a href="#">link</a> | PWMs     |
|     |                                                                                                                                                                                                                                                                                                                                                                                                                                                                         |         |                                                                                     |                                                                                      |                      |                      |          |
| 145 | <div><input type="checkbox"/> taipale_cyt_meth__JUN_NATGACKCATN_FL</div> <div>Description: JUN [bZIP] Possible TFs: JUN</div>                                                                                                                                                                                                                                                                                                                                           | 3.57363 |  |  | <a href="#">link</a> | <a href="#">link</a> | PWMs     |
|     |                                                                                                                                                                                                                                                                                                                                                                                                                                                                         |         |                                                                                     |                                                                                      |                      |                      |          |
| 146 | <div><input type="checkbox"/> transfac_pro__M03552</div> <div>Description: V\$JUND_Q6: JunD Possible TFs: JUND</div>                                                                                                                                                                                                                                                                                                                                                    | 3.57234 |  |  | <a href="#">link</a> | <a href="#">link</a> | PWMs     |
|     |                                                                                                                                                                                                                                                                                                                                                                                                                                                                         |         |                                                                                     |                                                                                      |                      |                      |          |

14/24



|                          |                                                                                                                                                                                                                                                                                                                                                                                                                                                                                                                         |                                               |                                                                                     |                                                                                      |                      |                      |             |  |
|--------------------------|-------------------------------------------------------------------------------------------------------------------------------------------------------------------------------------------------------------------------------------------------------------------------------------------------------------------------------------------------------------------------------------------------------------------------------------------------------------------------------------------------------------------------|-----------------------------------------------|-------------------------------------------------------------------------------------|--------------------------------------------------------------------------------------|----------------------|----------------------|-------------|--|
| 12/22/21, 1:56 PM        |                                                                                                                                                                                                                                                                                                                                                                                                                                                                                                                         | i-cisTarget: results for Butyrate-DARs-cattle |                                                                                     |                                                                                      |                      |                      | All         |  |
| #                        | Feature                                                                                                                                                                                                                                                                                                                                                                                                                                                                                                                 | NES                                           | Logo                                                                                | Recovery Curve                                                                       | Candidate targets    | regions in top 20000 | Database    |  |
| <input type="checkbox"/> | transfac_public_M00174                                                                                                                                                                                                                                                                                                                                                                                                                                                                                                  |                                               |                                                                                     |                                                                                      |                      |                      |             |  |
| 159                      | Description: V\$AP1_Q6: AP-1<br>Possible TFs: JUN, FOS                                                                                                                                                                                                                                                                                                                                                                                                                                                                  | 3.49245                                       | 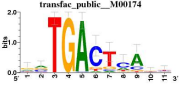   |    | <a href="#">link</a> | <a href="#">link</a> | PWMs        |  |
| <input type="checkbox"/> | dbcorrdh_EZH2_ENCSR000AQE_1_m9                                                                                                                                                                                                                                                                                                                                                                                                                                                                                          |                                               |                                                                                     |                                                                                      |                      |                      |             |  |
| 160                      | Description: EZH2 (ENCSR000AQE-1, motif 9)<br>Possible TFs: EZH2                                                                                                                                                                                                                                                                                                                                                                                                                                                        | 3.45237                                       |    |    | <a href="#">link</a> | <a href="#">link</a> | PWMs        |  |
| <input type="checkbox"/> | dbcorrdh_POLR2AphosphoS2_ENCSR000DYF_1_m10                                                                                                                                                                                                                                                                                                                                                                                                                                                                              |                                               |                                                                                     |                                                                                      |                      |                      |             |  |
| 161                      | Description: POLR2AphosphoS2 (ENCSR000DYF-1, motif 10)<br>Possible TFs: POLR2A                                                                                                                                                                                                                                                                                                                                                                                                                                          | 3.44985                                       |    |    | <a href="#">link</a> | <a href="#">link</a> | PWMs        |  |
| <input type="checkbox"/> | dbcorrdh_RCOR1_ENCSR000EFG_1_m1                                                                                                                                                                                                                                                                                                                                                                                                                                                                                         |                                               |                                                                                     |                                                                                      |                      |                      |             |  |
| 162                      | Description: RCOR1 (ENCSR000EFG-1, motif 1)<br>Possible TFs: RCOR1                                                                                                                                                                                                                                                                                                                                                                                                                                                      | 3.44478                                       |    |    | <a href="#">link</a> | <a href="#">link</a> | PWMs        |  |
| <input type="checkbox"/> | taipale_cyt_meth_JDP2_GATGASTCATC_eDBD                                                                                                                                                                                                                                                                                                                                                                                                                                                                                  |                                               |                                                                                     |                                                                                      |                      |                      |             |  |
| 163                      | Description: JDP2 [bZIP]<br>Possible TFs: JDP2                                                                                                                                                                                                                                                                                                                                                                                                                                                                          | 3.44229                                       |    |    | <a href="#">link</a> | <a href="#">link</a> | PWMs        |  |
| <input type="checkbox"/> | dbcorrdh_NELFE_ENCSR000DOF_1_m6                                                                                                                                                                                                                                                                                                                                                                                                                                                                                         |                                               |                                                                                     |                                                                                      |                      |                      |             |  |
| 164                      | Description: NELFE (ENCSR000DOF-1, motif 6)<br>Possible TFs: NELFE                                                                                                                                                                                                                                                                                                                                                                                                                                                      | 3.44192                                       |   |   | <a href="#">link</a> | <a href="#">link</a> | PWMs        |  |
| <input type="checkbox"/> | hdpi_MCTP2                                                                                                                                                                                                                                                                                                                                                                                                                                                                                                              |                                               |                                                                                     |                                                                                      |                      |                      |             |  |
| 165                      | Description: MCTP2<br>Possible TFs: MCTP2                                                                                                                                                                                                                                                                                                                                                                                                                                                                               | 3.43699                                       |  |  | <a href="#">link</a> | <a href="#">link</a> | PWMs        |  |
| <input type="checkbox"/> | cisbp_M2979                                                                                                                                                                                                                                                                                                                                                                                                                                                                                                             |                                               |                                                                                     |                                                                                      |                      |                      |             |  |
| 166                      | Description: BACH1[ <i>gene ID</i> : "ENSG00000156273" <i>species</i> : "Homo sapiens" <i>TF status</i> : "direct" <i>TF family</i> : "bZIP" <i>DBDs</i> : "bZIP_1"]; Bach1[ <i>gene ID</i> : "ENSMUSG00000025612" <i>species</i> : "Mus musculus" <i>TF status</i> : "inferred" <i>TF family</i> : "bZIP" <i>DBDs</i> : "bZIP_1"]; Bach2[ <i>gene ID</i> : "ENSMUSG00000040270" <i>species</i> : "Mus musculus" <i>TF status</i> : "inferred" <i>TF family</i> : "bZIP" <i>DBDs</i> : "bZIP_1"]<br>Possible TFs: BACH1 | 3.43606                                       |  |  | <a href="#">link</a> | <a href="#">link</a> | PWMs        |  |
| <input type="checkbox"/> | dbcorrdh_ZMIZ1_ENCSR000EFQ_1_m1                                                                                                                                                                                                                                                                                                                                                                                                                                                                                         |                                               |                                                                                     |                                                                                      |                      |                      |             |  |
| 167                      | Description: ZMIZ1 (ENCSR000EFQ-1, motif 1)<br>Possible TFs: ZMIZ1                                                                                                                                                                                                                                                                                                                                                                                                                                                      | 3.43215                                       |  |  | <a href="#">link</a> | <a href="#">link</a> | PWMs        |  |
| <input type="checkbox"/> | ENCF001WHU                                                                                                                                                                                                                                                                                                                                                                                                                                                                                                              |                                               |                                                                                     |                                                                                      |                      |                      |             |  |
| 168                      | Description: DNase-seq on human HCFaa                                                                                                                                                                                                                                                                                                                                                                                                                                                                                   | 3.43198                                       |                                                                                     |  | <a href="#">link</a> | <a href="#">link</a> | DHS & FAIRE |  |
| <input type="checkbox"/> | cisbp_M6229                                                                                                                                                                                                                                                                                                                                                                                                                                                                                                             |                                               |                                                                                     |                                                                                      |                      |                      |             |  |
| 169                      | Description: FOSL1[ <i>gene ID</i> : "ENSG00000175592" <i>species</i> : "Homo sapiens" <i>TF status</i> : "direct" <i>TF family</i> : "bZIP" <i>DBDs</i> : "bZIP_1"]; Fos[ <i>gene ID</i> : "ENSMUSG00000021250" <i>species</i> : "Mus musculus" <i>TF status</i> : "inferred" <i>TF family</i> : "bZIP" <i>DBDs</i> : "bZIP_1"]; Fosb[ <i>gene ID</i> : "ENSMUSG00000003545" <i>species</i> : "Mus musculus" <i>TF status</i> : "inferred" <i>TF family</i> : "bZIP" <i>DBDs</i> : "bZIP_1"]<br>Possible TFs: FOSL1    | 3.43090                                       |  |  | <a href="#">link</a> | <a href="#">link</a> | PWMs        |  |

|                   |                                                                                                                                                                                                                                                                                                                                                        |                                               |                                                                                     |                                                                                      |                      |                      |          |  |
|-------------------|--------------------------------------------------------------------------------------------------------------------------------------------------------------------------------------------------------------------------------------------------------------------------------------------------------------------------------------------------------|-----------------------------------------------|-------------------------------------------------------------------------------------|--------------------------------------------------------------------------------------|----------------------|----------------------|----------|--|
| 12/22/21, 1:56 PM |                                                                                                                                                                                                                                                                                                                                                        | i-cisTarget: results for Butyrate-DARs-cattle |                                                                                     |                                                                                      |                      | All                  |          |  |
| #                 | Feature                                                                                                                                                                                                                                                                                                                                                | NES                                           | Logo                                                                                | Recovery Curve                                                                       | Candidate targets    | regions in top 20000 | Database |  |
| 170               | <div><input type="checkbox"/> cisbp__M5659</div> <div>Description: NFE2[<i>gene ID: "ENSG00000123405" species: "Homo sapiens" TF status: "direct" TF family: "bZIP" DBDs: "bZIP_1"; Nfe2[<i>gene ID: "ENSMUSG00000058794" species: "Mus musculus" TF status: "inferred" TF family: "bZIP" DBDs: "bZIP_1"]</i></i>]</div> <div>Possible TFs: NFE2</div> | 3.42783                                       | 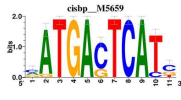   |    | <a href="#">link</a> | <a href="#">link</a> | PWMs     |  |
| 171               | <div><input type="checkbox"/> dbcorrd__eGFP-JUND__ENCNR000DJX_1__m1</div> <div>Description: eGFP-JUND (ENCNR000DJX-1, motif 1)</div>                                                                                                                                                                                                                   | 3.42356                                       |    |    | <a href="#">link</a> | <a href="#">link</a> | PWMs     |  |
| 172               | <div><input type="checkbox"/> dbcorrd__JUN__ENCNR000EGH_1__m1</div> <div>Description: JUN (ENCNR000EGH-1, motif 1)</div> <div>Possible TFs: JUN</div>                                                                                                                                                                                                  | 3.41519                                       |    |    | <a href="#">link</a> | <a href="#">link</a> | PWMs     |  |
| 173               | <div><input type="checkbox"/> transfac_pro__M07600</div> <div>Description: V\$CFOS_Q4: C-Fos</div> <div>Possible TFs: FOS</div>                                                                                                                                                                                                                        | 3.40439                                       |    |    | <a href="#">link</a> | <a href="#">link</a> | PWMs     |  |
| 174               | <div><input type="checkbox"/> taipale_cyt_meth__BACH2_NWANCATGASTCATSNTWN_eDBD</div> <div>Description: BACH2 [bZIP]</div> <div>Possible TFs: BACH2</div>                                                                                                                                                                                               | 3.40350                                       |    |    | <a href="#">link</a> | <a href="#">link</a> | PWMs     |  |
| 175               | <div><input type="checkbox"/> dbcorrd__SREBF1__ENCNR000EZF_1__m1</div> <div>Description: SREBF1 (ENCNR000EZF-1, motif 1)</div> <div>Possible TFs: SREBF1</div>                                                                                                                                                                                         | 3.39863                                       |   |   | <a href="#">link</a> | <a href="#">link</a> | PWMs     |  |
| 176               | <div><input type="checkbox"/> dbcorrd__CEBPB__ENCNR000EBV_1__m2</div> <div>Description: CEBPB (ENCNR000EBV-1, motif 2)</div> <div>Possible TFs: CEBPB</div>                                                                                                                                                                                            | 3.39489                                       |  |  | <a href="#">link</a> | <a href="#">link</a> | PWMs     |  |
| 177               | <div><input type="checkbox"/> taipale_cyt_meth__JDP2_NATGASTCAYN_eDBD_meth</div> <div>Description: JDP2 [bZIP, CpG-meth]</div> <div>Possible TFs: JDP2</div>                                                                                                                                                                                           | 3.38721                                       |  |  | <a href="#">link</a> | <a href="#">link</a> | PWMs     |  |
| 178               | <div><input type="checkbox"/> cisbp__M0320</div> <div>Description: Jund[<i>gene ID: "ENSMUSG00000071076" species: "Mus musculus" TF status: "direct" TF family: "bZIP" DBDs: "bZIP_1"]</i>]</div> <div>Possible TFs: JUND</div>                                                                                                                        | 3.38511                                       |  |  | <a href="#">link</a> | <a href="#">link</a> | PWMs     |  |
| 179               | <div><input type="checkbox"/> jaspar__MA0320.1</div> <div>Description: IME1</div>                                                                                                                                                                                                                                                                      | 3.38164                                       |  |  | <a href="#">link</a> | <a href="#">link</a> | PWMs     |  |
| 180               | <div><input type="checkbox"/> dbcorrd__BRF1__ENCNR000DOJ_1__m2</div> <div>Description: BRF1 (ENCNR000DOJ-1, motif 2)</div> <div>Possible TFs: BRF1</div>                                                                                                                                                                                               | 3.38094                                       |  |  | <a href="#">link</a> | <a href="#">link</a> | PWMs     |  |
| 181               | <div><input type="checkbox"/> transfac_pro__M03538</div> <div>Description: V\$AP1_Q6_02: AP-1</div> <div>Possible TFs: JUN, FOS</div>                                                                                                                                                                                                                  | 3.38054                                       |  |  | <a href="#">link</a> | <a href="#">link</a> | PWMs     |  |

|                   |                                                                                                                                                                                     |                                               |                                                                                     |                                                                                      |                      |                      |                       |
|-------------------|-------------------------------------------------------------------------------------------------------------------------------------------------------------------------------------|-----------------------------------------------|-------------------------------------------------------------------------------------|--------------------------------------------------------------------------------------|----------------------|----------------------|-----------------------|
| 12/22/21, 1:56 PM |                                                                                                                                                                                     | i-cisTarget: results for Butyrate-DARs-cattle |                                                                                     |                                                                                      | All                  |                      |                       |
| #                 | Feature                                                                                                                                                                             | NES                                           | Logo                                                                                | Recovery Curve                                                                       | Candidate targets    | regions in top 20000 | Database              |
| 182               | <input type="checkbox"/> cisbp_M2125<br>Description: IME1[ <i>gene ID: "YJR094C" species: "Saccharomyces cerevisiae" TF status: "direct" TF family: "Unknown" DBDs: "UNKNOWN"</i> ] | 3.37625                                       | 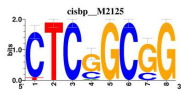   |    | <a href="#">link</a> | <a href="#">link</a> | PWMs                  |
| 183               | <input type="checkbox"/> dbcorrd_b_HDAC2_ENCSR000AQG_1_m4<br>Description: HDAC2 (ENCSR000AQG-1, motif 4)<br>Possible TFs: HDAC2                                                     | 3.35751                                       |    |    | <a href="#">link</a> | <a href="#">link</a> | PWMs                  |
| 184               | <input type="checkbox"/> dbcorrd_b_BRF1_ENCSR000DNW_1_m2<br>Description: BRF1 (ENCSR000DNW-1, motif 2)<br>Possible TFs: BRF1                                                        | 3.34671                                       |    |    | <a href="#">link</a> | <a href="#">link</a> | PWMs                  |
| 185               | <input type="checkbox"/> transfac_pro_M00926<br>Description: V\$AP1_Q4_01: AP-1<br>Possible TFs: FOS, FOSB, JUNB, JUN, JUND, FOSL1, FOSL2                                           | 3.31947                                       |    |    | <a href="#">link</a> | <a href="#">link</a> | PWMs                  |
| 186               | <input type="checkbox"/> dbcorrd_b_SMARCA4_ENCSR000EYC_1_m10<br>Description: SMARCA4 (ENCSR000EYC-1, motif 10)<br>Possible TFs: SMARCA4                                             | 3.31600                                       |    |    | <a href="#">link</a> | <a href="#">link</a> | PWMs                  |
| 187               | <input type="checkbox"/> transfac_public_M00495<br>Description: V\$BACH1_01: Bach1<br>Possible TFs: BACH1                                                                           | 3.31247                                       |    |   | <a href="#">link</a> | <a href="#">link</a> | PWMs                  |
| 188               | <input type="checkbox"/> dbcorrd_b_SIN3A_ENCSR000BRM_1_m1<br>Description: SIN3A (ENCSR000BRM-1, motif 1)<br>Possible TFs: SIN3A                                                     | 3.30958                                       |  |  | <a href="#">link</a> | <a href="#">link</a> | PWMs                  |
| 189               | <input type="checkbox"/> taipale_cyt_meth_JDP2_NRTGASTCAYN_FL<br>Description: JDP2 [bZIP]<br>Possible TFs: JDP2                                                                     | 3.30844                                       |  |  | <a href="#">link</a> | <a href="#">link</a> | PWMs                  |
| 190               | <input type="checkbox"/> dbcorrd_b_ZMIZ1_ENCSR000EFQ_1_m2<br>Description: ZMIZ1 (ENCSR000EFQ-1, motif 2)<br>Possible TFs: ZMIZ1                                                     | 3.30808                                       |  |  | <a href="#">link</a> | <a href="#">link</a> | PWMs                  |
| 191               | <input type="checkbox"/> jaspar_MA0099.2<br>Description: FOS::JUN<br>Possible TFs: JUN                                                                                              | 3.30115                                       |  |  | <a href="#">link</a> | <a href="#">link</a> | PWMs                  |
| 192               | <input type="checkbox"/> ENCF001XKD<br>Description: H3K4me3 ChIP-seq on human WI-38                                                                                                 | 3.30098                                       |                                                                                     |  | <a href="#">link</a> | <a href="#">link</a> | Histone modifications |
| 193               | <input type="checkbox"/> cisbp_M0322<br>Description: M0322                                                                                                                          | 3.28224                                       |  |  | <a href="#">link</a> | <a href="#">link</a> | PWMs                  |
| 194               | <input type="checkbox"/> transfac_pro_M04685<br>Description: V\$NFE2_04: NF-E2<br>Possible TFs: NFE2                                                                                | 3.27752                                       |  |  | <a href="#">link</a> | <a href="#">link</a> | PWMs                  |

|     |                                                                                                                                                                          | i-cisTarget: results for Butyrate-DARs-cattle |      |                | All<br>Candidate regions<br>in top<br>20000<br>Database |                      |                       |
|-----|--------------------------------------------------------------------------------------------------------------------------------------------------------------------------|-----------------------------------------------|------|----------------|---------------------------------------------------------|----------------------|-----------------------|
| #   | Feature                                                                                                                                                                  | NES                                           | Logo | Recovery Curve | link                                                    | link                 | link                  |
| 195 | <input type="checkbox"/> ENCF001WPG<br>Description: UW human LHCN-M2 DNase-seq                                                                                           | 3.25957                                       |      |                | <a href="#">link</a>                                    | <a href="#">link</a> | DHS & FAIRE           |
| 196 | <input type="checkbox"/> predrem__nrMotif95<br>Description: 260_H9_P42-DS18522.M174                                                                                      | 3.25415                                       |      |                | <a href="#">link</a>                                    | <a href="#">link</a> | PWMs                  |
| 197 | <input type="checkbox"/> ENCF001UPC<br>Description: FOSL2 ChIP-seq protocol v042211.1 on human SK-N-SH                                                                   | 3.25212                                       |      |                | <a href="#">link</a>                                    | <a href="#">link</a> | TF binding sites      |
| 198 | <input type="checkbox"/> swissregulon__sacCer__NHP10<br>Description: sacCer__NHP10                                                                                       | 3.25159                                       |      |                | <a href="#">link</a>                                    | <a href="#">link</a> | PWMs                  |
| 199 | <input type="checkbox"/> ENCF001WFC<br>Description: UW human GM04503 DNase-seq                                                                                           | 3.24954                                       |      |                | <a href="#">link</a>                                    | <a href="#">link</a> | DHS & FAIRE           |
| 200 | <input type="checkbox"/> transfac_pro__M01643<br>Description: F\$NHP10_01: NHP10                                                                                         | 3.24331                                       |      |                | <a href="#">link</a>                                    | <a href="#">link</a> | PWMs                  |
| 201 | <input type="checkbox"/> dbcorrd__ESRRA__ENCSR000DYQ_1__m5<br>Description: ESRRA (ENCSR000DYQ-1, motif 5)<br>Possible TFs: ESRRA                                         | 3.24250                                       |      |                | <a href="#">link</a>                                    | <a href="#">link</a> | PWMs                  |
| 202 | <input type="checkbox"/> jasper__MA0344.1<br>Description: NHP10                                                                                                          | 3.24128                                       |      |                | <a href="#">link</a>                                    | <a href="#">link</a> | PWMs                  |
| 203 | <input type="checkbox"/> cisbp__M4220<br>Description: NHP10[gene ID: "YDL002C" species: "Saccharomyces cerevisiae" TF status: "direct" TF family: "Sox" DBDs: "HMG_box"] | 3.24004                                       |      |                | <a href="#">link</a>                                    | <a href="#">link</a> | PWMs                  |
| 204 | <input type="checkbox"/> yetfasco__YDL002C_502<br>Description: YDL002C_502                                                                                               | 3.23630                                       |      |                | <a href="#">link</a>                                    | <a href="#">link</a> | PWMs                  |
| 205 | <input type="checkbox"/> predrem__nrMotif1814<br>Description: 304_hTH1-DS7840.M463                                                                                       | 3.23582                                       |      |                | <a href="#">link</a>                                    | <a href="#">link</a> | PWMs                  |
| 206 | <input type="checkbox"/> dbcorrd__MEF2A__ENCSR000BNV_1__m2<br>Description: MEF2A (ENCSR000BNV-1, motif 2)<br>Possible TFs: MEF2A                                         | 3.23516                                       |      |                | <a href="#">link</a>                                    | <a href="#">link</a> | PWMs                  |
| 207 | <input type="checkbox"/> ENCF001XIE<br>Description: H3K4me3 ChIP-seq on human NHLF                                                                                       | 3.22909                                       |      |                | <a href="#">link</a>                                    | <a href="#">link</a> | Histone modifications |

| #   | Feature                                                                                                                                                                         | NES     | Logo                                                                                | Recovery Curve                                                                       | Candidate targets    | All regions in top 20000 | Database              |
|-----|---------------------------------------------------------------------------------------------------------------------------------------------------------------------------------|---------|-------------------------------------------------------------------------------------|--------------------------------------------------------------------------------------|----------------------|--------------------------|-----------------------|
| 208 | <input type="checkbox"/> ENCF001SSA<br>Description: DNase-seq on human NHLF                                                                                                     | 3.22735 |                                                                                     | 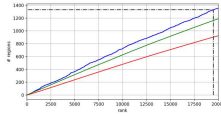   | <a href="#">link</a> | <a href="#">link</a>     | DHS & FAIRE           |
| 209 | <input type="checkbox"/> ENCF001WRL<br>Description: DNase-seq on human NHLF                                                                                                     | 3.22735 |                                                                                     |    | <a href="#">link</a> | <a href="#">link</a>     | DHS & FAIRE           |
| 210 | <input type="checkbox"/> ENCF001WBU<br>Description: DNase-seq on human NH-A                                                                                                     | 3.19764 |                                                                                     |    | <a href="#">link</a> | <a href="#">link</a>     | DHS & FAIRE           |
| 211 | <input type="checkbox"/> cisbp__M2428<br>Description: GCN4[ <i>gene ID: "YEL009C" species: "Saccharomyces cerevisiae"</i> TF status: "direct" TF family: "bZIP" DBDs: "bZIP_1"] | 3.18283 |    |    | <a href="#">link</a> | <a href="#">link</a>     | PWMs                  |
| 212 | <input type="checkbox"/> swissregulon__hs__FOSL2.p2<br>Description: hs__FOSL2.p2<br>Possible TFs: FOSL2                                                                         | 3.18007 |    |    | <a href="#">link</a> | <a href="#">link</a>     | PWMs                  |
| 213 | <input type="checkbox"/> transfac_pro__M00925<br>Description: V\$AP1_Q6_01: AP-1<br>Possible TFs: FOS, FOSB, JUNB, JUN, JUND, FOSL1, FOSL2                                      | 3.17392 |    |   | <a href="#">link</a> | <a href="#">link</a>     | PWMs                  |
| 214 | <input type="checkbox"/> predrem__nrMotif2358<br>Description: 38_fBrain-DS20231.M303                                                                                            | 3.17315 |  |  | <a href="#">link</a> | <a href="#">link</a>     | PWMs                  |
| 215 | <input type="checkbox"/> scertf__macisaac.URC2<br>Description: macisaac.URC2                                                                                                    | 3.17234 |  |  | <a href="#">link</a> | <a href="#">link</a>     | PWMs                  |
| 216 | <input type="checkbox"/> hdp1__ZCCHC14<br>Description: ZCCHC14<br>Possible TFs: ZCCHC14                                                                                         | 3.16106 |  |  | <a href="#">link</a> | <a href="#">link</a>     | PWMs                  |
| 217 | <input type="checkbox"/> ENCF001XKE<br>Description: H3K4me3 ChIP-seq on human WI-38                                                                                             | 3.15549 |                                                                                     |  | <a href="#">link</a> | <a href="#">link</a>     | Histone modifications |
| 218 | <input type="checkbox"/> elemento__CGCGCCC<br>Description: Conserved regulatory element CGCGCCC between Hs and Mm                                                               | 3.15132 |  |  | <a href="#">link</a> | <a href="#">link</a>     | PWMs                  |
| 219 | <input type="checkbox"/> taipale_cyt_meth__ZNF704_NRCCGGCCGGYN_FL_meth_repr<br>Description: ZNF704 [Znf_C2H2, CpG-meth]<br>Possible TFs: ZNF704                                 | 3.15068 |  |  | <a href="#">link</a> | <a href="#">link</a>     | PWMs                  |
| 220 | <input type="checkbox"/> ENCF001SRX<br>Description: DNase-seq on human NH-A                                                                                                     | 3.14921 |                                                                                     |  | <a href="#">link</a> | <a href="#">link</a>     | DHS & FAIRE           |



| #   | Feature                                                                                                                                                                           | NES     | Logo                                                                                | Recovery Curve                                                                       | Candidate targets    | All regions in top 20000 | Database              |
|-----|-----------------------------------------------------------------------------------------------------------------------------------------------------------------------------------|---------|-------------------------------------------------------------------------------------|--------------------------------------------------------------------------------------|----------------------|--------------------------|-----------------------|
| 221 | <input type="checkbox"/> ENCF001WQR<br>Description: DNase-seq on human NH-A                                                                                                       | 3.14921 |                                                                                     | 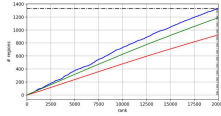   | <a href="#">link</a> | <a href="#">link</a>     | DHS & FAIRE           |
| 222 | <input type="checkbox"/> ENCF001XJZ<br>Description: H3K4me3 ChIP-seq on human WI-38 treated with 4-hydroxy-tamoxifen at 20nM for 72 hours                                         | 3.14778 |                                                                                     |    | <a href="#">link</a> | <a href="#">link</a>     | Histone modifications |
| 223 | <input type="checkbox"/> cisbp__M1383<br>Description: M1383                                                                                                                       | 3.14279 |    |    | <a href="#">link</a> | <a href="#">link</a>     | PWMs                  |
| 224 | <input type="checkbox"/> transfac_public__M00038<br>Description: F\$GCN4_01: Gcn4p                                                                                                | 3.14069 |    |    | <a href="#">link</a> | <a href="#">link</a>     | PWMs                  |
| 225 | <input type="checkbox"/> hocomoco__ZBT14_HUMAN.H11MO.0.C<br>Description: ZBT14_HUMAN<br>Possible TFs: ZBTB14                                                                      | 3.13941 |    |    | <a href="#">link</a> | <a href="#">link</a>     | PWMs                  |
| 226 | <input type="checkbox"/> dbcorrd__SMARCB1__ENCSR000EDK_1__m1<br>Description: SMARCB1 (ENCSR000EDK-1, motif 1)<br>Possible TFs: SMARCB1                                            | 3.13914 |    |   | <a href="#">link</a> | <a href="#">link</a>     | PWMs                  |
| 227 | <input type="checkbox"/> cisbp__M1789<br>Description: RSC30[gene ID: "YHR056C" species: "Saccharomyces cerevisiae" TF status: "direct" TF family: "Zinc cluster" DBDs: "Zn_clus"] | 3.13636 |  |  | <a href="#">link</a> | <a href="#">link</a>     | PWMs                  |
| 228 | <input type="checkbox"/> dbcorrd__MXI1__ENCSR000EIA_1__m4<br>Description: MXI1 (ENCSR000EIA-1, motif 4)<br>Possible TFs: MXI1                                                     | 3.13151 |  |  | <a href="#">link</a> | <a href="#">link</a>     | PWMs                  |
| 229 | <input type="checkbox"/> predrem__nrMotif374<br>Description: 304_hTH1-DS7840.M360                                                                                                 | 3.12691 |  |  | <a href="#">link</a> | <a href="#">link</a>     | PWMs                  |
| 230 | <input type="checkbox"/> ENCF001WAW<br>Description: DNase-seq on human HRCepC                                                                                                     | 3.12593 |                                                                                     |  | <a href="#">link</a> | <a href="#">link</a>     | DHS & FAIRE           |
| 231 | <input type="checkbox"/> cisbp__M1774<br>Description: RDS1[gene ID: "YCR106W" species: "Saccharomyces cerevisiae" TF status: "direct" TF family: "Zinc cluster" DBDs: "Zn_clus"]  | 3.12441 |  |  | <a href="#">link</a> | <a href="#">link</a>     | PWMs                  |
| 232 | <input type="checkbox"/> ENCF001SQQ<br>Description: DNase-seq on human HCFaa                                                                                                      | 3.11953 |                                                                                     |  | <a href="#">link</a> | <a href="#">link</a>     | DHS & FAIRE           |
| 233 | <input type="checkbox"/> ENCF001WHT<br>Description: DNase-seq on human HCFaa                                                                                                      | 3.11953 |                                                                                     |  | <a href="#">link</a> | <a href="#">link</a>     | DHS & FAIRE           |

|                   |                                                                                                                                                                                                  |                                               |      |                |                      |                      |                       |
|-------------------|--------------------------------------------------------------------------------------------------------------------------------------------------------------------------------------------------|-----------------------------------------------|------|----------------|----------------------|----------------------|-----------------------|
| 12/22/21, 1:56 PM |                                                                                                                                                                                                  | i-cisTarget: results for Butyrate-DARs-cattle |      |                | All                  |                      |                       |
| #                 | Feature                                                                                                                                                                                          | NES                                           | Logo | Recovery Curve | Candidate targets    | regions in top 20000 | Database              |
| 234               | <input type="checkbox"/> dbcorrd_b__EZH2__ENCSR000ARD_1__m6<br>Description: EZH2 (ENCSR000ARD-1, motif 6)<br>Possible TFs: EZH2                                                                  | 3.11938                                       |      |                | <a href="#">link</a> | <a href="#">link</a> | PWMs                  |
| 235               | <input type="checkbox"/> scerf__macisaac.IME1<br>Description: macisaac.IME1                                                                                                                      | 3.10908                                       |      |                | <a href="#">link</a> | <a href="#">link</a> | PWMs                  |
| 236               | <input type="checkbox"/> dbcorrd_b__CTCF__ENCSR000BHW_1__m2<br>Description: CTCF (ENCSR000BHW-1, motif 2)<br>Possible TFs: CTCF                                                                  | 3.10449                                       |      |                | <a href="#">link</a> | <a href="#">link</a> | PWMs                  |
| 237               | <input type="checkbox"/> elemento__CTCCGCG<br>Description: Conserved regulatory element CTCCGCG between Hs and Mm                                                                                | 3.09450                                       |      |                | <a href="#">link</a> | <a href="#">link</a> | PWMs                  |
| 238               | <input type="checkbox"/> transfac_pro__M06208<br>Description: V\$ZNF460_01: ZNF460<br>Possible TFs: ZNF460                                                                                       | 3.09286                                       |      |                | <a href="#">link</a> | <a href="#">link</a> | PWMs                  |
| 239               | <input type="checkbox"/> transfac_pro__M01909<br>Description: F\$PUT3_02: Put3p                                                                                                                  | 3.08666                                       |      |                | <a href="#">link</a> | <a href="#">link</a> | PWMs                  |
| 240               | <input type="checkbox"/> cisbp__M1262<br>Description: Irf9[<br>gene ID: "ENSMUSG00000002325" species: "Mus musculus"]<br>TF status: "direct" TF family: "IRF" DBDs: "IRF"]<br>Possible TFs: IRF9 | 3.08569                                       |      |                | <a href="#">link</a> | <a href="#">link</a> | PWMs                  |
| 241               | <input type="checkbox"/> jaspar__MA0358.1<br>Description: PUT3                                                                                                                                   | 3.08373                                       |      |                | <a href="#">link</a> | <a href="#">link</a> | PWMs                  |
| 242               | <input type="checkbox"/> transfac_pro__M01684<br>Description: F\$IME1_01: IME1                                                                                                                   | 3.08069                                       |      |                | <a href="#">link</a> | <a href="#">link</a> | PWMs                  |
| 243               | <input type="checkbox"/> predrem__nrMotif1831<br>Description: 343_SKNSH-DS8482.M638                                                                                                              | 3.07906                                       |      |                | <a href="#">link</a> | <a href="#">link</a> | PWMs                  |
| 244               | <input type="checkbox"/> ENCF001XAX<br>Description: H3K4me3 ChIP-seq on human HAC                                                                                                                | 3.06524                                       |      |                | <a href="#">link</a> | <a href="#">link</a> | Histone modifications |
| 245               | <input type="checkbox"/> dbcorrd_b__XRCC4__ENCSR000FAC_1__m1<br>Description: XRCC4 (ENCSR000FAC-1, motif 1)<br>Possible TFs: XRCC4                                                               | 3.06378                                       |      |                | <a href="#">link</a> | <a href="#">link</a> | PWMs                  |
| 246               | <input type="checkbox"/> hocomoco__BATF_MOUSE.H11MO.1.A<br>Description: BATF_MOUSE<br>Possible TFs: BATF                                                                                         | 3.06229                                       |      |                | <a href="#">link</a> | <a href="#">link</a> | PWMs                  |

| #   | Feature                                                                                                                                                                       | NES     | Logo                                                                                | Recovery Curve                                                                       | Candidate targets    | All regions in top 20000 | Database              |
|-----|-------------------------------------------------------------------------------------------------------------------------------------------------------------------------------|---------|-------------------------------------------------------------------------------------|--------------------------------------------------------------------------------------|----------------------|--------------------------|-----------------------|
| 247 | <input type="checkbox"/> dbcorrdB__SREBF2__ENCSR000EZO_1__m1<br>Description: SREBF2 (ENCSR000EZO-1, motif 1)<br>Possible TFs: SREBF2                                          | 3.06197 | 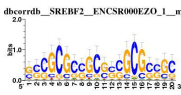   |    | <a href="#">link</a> | <a href="#">link</a>     | PWMs                  |
| 248 | <input type="checkbox"/> jaspAr__MA1052.1<br>Description: RAP2-6                                                                                                              | 3.05101 |    |    | <a href="#">link</a> | <a href="#">link</a>     | PWMs                  |
| 249 | <input type="checkbox"/> predrem__nrMotif2242<br>Description: 234_fStomach-DS17172.M267                                                                                       | 3.05071 |    |    | <a href="#">link</a> | <a href="#">link</a>     | PWMs                  |
| 250 | <input type="checkbox"/> ENCF001XIA<br>Description: H3K4me3 ChIP-seq on human NHEK                                                                                            | 3.04997 |                                                                                     |    | <a href="#">link</a> | <a href="#">link</a>     | Histone modifications |
| 251 | <input type="checkbox"/> predrem__nrMotif1056<br>Description: 151_fLung_R-DS16566.M380                                                                                        | 3.04731 |    |    | <a href="#">link</a> | <a href="#">link</a>     | PWMs                  |
| 252 | <input type="checkbox"/> transfac_pro__M01795<br>Description: F\$CAP1CA_01: Cap1                                                                                              | 3.04701 |    |   | <a href="#">link</a> | <a href="#">link</a>     | PWMs                  |
| 253 | <input type="checkbox"/> dbcorrdB__STAT3__ENCSR000DOX_1__m2<br>Description: STAT3 (ENCSR000DOX-1, motif 2)<br>Possible TFs: STAT3                                             | 3.04406 |  |  | <a href="#">link</a> | <a href="#">link</a>     | PWMs                  |
| 254 | <input type="checkbox"/> predrem__nrMotif220<br>Description: 10_CACO2-DS8235.M875                                                                                             | 3.04166 |  |  | <a href="#">link</a> | <a href="#">link</a>     | PWMs                  |
| 255 | <input type="checkbox"/> cisbp__M0549<br>Description: M0549                                                                                                                   | 3.03827 |  |  | <a href="#">link</a> | <a href="#">link</a>     | PWMs                  |
| 256 | <input type="checkbox"/> ENCF001XHZ<br>Description: H3K4me3 ChIP-seq on human NHEK                                                                                            | 3.03804 |                                                                                     |  | <a href="#">link</a> | <a href="#">link</a>     | Histone modifications |
| 257 | <input type="checkbox"/> elemento__CGCCGCC<br>Description: Conserved regulatory element CGCCGCC between Dmel and Dpse; Conserved regulatory element CGCCGCC between Hs and Mm | 3.03771 |  |  | <a href="#">link</a> | <a href="#">link</a>     | PWMs                  |
| 258 | <input type="checkbox"/> elemento__CCGCGCC<br>Description: Conserved regulatory element CCGCGCC between Hs and Mm                                                             | 3.03614 |  |  | <a href="#">link</a> | <a href="#">link</a>     | PWMs                  |
| 259 | <input type="checkbox"/> dbcorrdB__ATF3__ENCSR000BNU_1__m1<br>Description: ATF3 (ENCSR000BNU-1, motif 1)<br>Possible TFs: ATF3                                                | 3.03387 |  |  | <a href="#">link</a> | <a href="#">link</a>     | PWMs                  |

| #   | Feature                                                                                                                                                      | NES     | Logo                                                                                | Recovery Curve                                                                       | All                  |                      |                       |
|-----|--------------------------------------------------------------------------------------------------------------------------------------------------------------|---------|-------------------------------------------------------------------------------------|--------------------------------------------------------------------------------------|----------------------|----------------------|-----------------------|
|     |                                                                                                                                                              |         |                                                                                     |                                                                                      | Candidate targets    | regions in top 20000 | Database              |
| 260 | <div><input type="checkbox"/> scertf__zhao.RDS2</div> <div>Description: zhao.RDS2</div>                                                                      | 3.03220 | 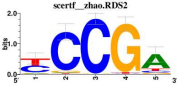   |    | <a href="#">link</a> | <a href="#">link</a> | PWMs                  |
| 261 | <div><input type="checkbox"/> predrem__nrMotif1451</div> <div>Description: 110_fKidney_renal_cortex_R-DS19254.M224</div>                                     | 3.02130 |    |    | <a href="#">link</a> | <a href="#">link</a> | PWMs                  |
| 262 | <div><input type="checkbox"/> ENCF001SQB</div> <div>Description: DNase-seq on human BJ</div>                                                                 | 3.01996 |                                                                                     |    | <a href="#">link</a> | <a href="#">link</a> | DHS & FAIRE           |
| 263 | <div><input type="checkbox"/> ENCF001WEH</div> <div>Description: DNase-seq on human BJ</div>                                                                 | 3.01996 |                                                                                     |    | <a href="#">link</a> | <a href="#">link</a> | DHS & FAIRE           |
| 264 | <div><input type="checkbox"/> ENCF001XKA</div> <div>Description: H3K4me3 ChIP-seq on human WI-38 treated with 4-hydroxy-tamoxifen at 20nM for 72 hours</div> | 3.01428 |                                                                                     |    | <a href="#">link</a> | <a href="#">link</a> | Histone modifications |
| 265 | <div><input type="checkbox"/> ENCF001XID</div> <div>Description: H3K4me3 ChIP-seq on human NHLF</div>                                                        | 3.01206 |                                                                                     |   | <a href="#">link</a> | <a href="#">link</a> | Histone modifications |
| 266 | <div><input type="checkbox"/> ENCF001XHN</div> <div>Description: H3K4me3 ChIP-seq on human NHDF-neo</div>                                                    | 3.01014 |                                                                                     |  | <a href="#">link</a> | <a href="#">link</a> | Histone modifications |
| 267 | <div><input type="checkbox"/> dbcorrd__JUND__ENCSR000EBZ_1__m1</div> <div>Description: JUND (ENCSR000EBZ-1, motif 1)</div> <div>Possible TFs: JUND</div>     | 3.00939 |  |  | <a href="#">link</a> | <a href="#">link</a> | PWMs                  |
| 268 | <div><input type="checkbox"/> ENCF001WRM</div> <div>Description: DNase-seq on human NHLF</div>                                                               | 3.00847 |                                                                                     |  | <a href="#">link</a> | <a href="#">link</a> | DHS & FAIRE           |
| 269 | <div><input type="checkbox"/> transfac_pro__M09074</div> <div>Description: P\$ERF4_05: ERF4</div>                                                            | 3.00498 |  |  | <a href="#">link</a> | <a href="#">link</a> | PWMs                  |
| 270 | <div><input type="checkbox"/> predrem__nrMotif1026</div> <div>Description: 192_fMuscle_leg-DS18471.M103</div>                                                | 3.00379 |  |  | <a href="#">link</a> | <a href="#">link</a> | PWMs                  |
| 271 | <div><input type="checkbox"/> jaspar__MA1034.1</div> <div>Description: Os05g0497200</div>                                                                    | 3.00353 |  |  | <a href="#">link</a> | <a href="#">link</a> | PWMs                  |
| 272 | <div><input type="checkbox"/> elemento__TCCCCGC</div> <div>Description: Conserved regulatory element TCCCCGC between Hs and Mm</div>                         | 3.00173 |  |  | <a href="#">link</a> | <a href="#">link</a> | PWMs                  |
