# Supplementary material
Source: MDPI journal article supplement (https://www.mdpi.com/2673-933X/2/2/15)
Supplement: s1 [file s1]

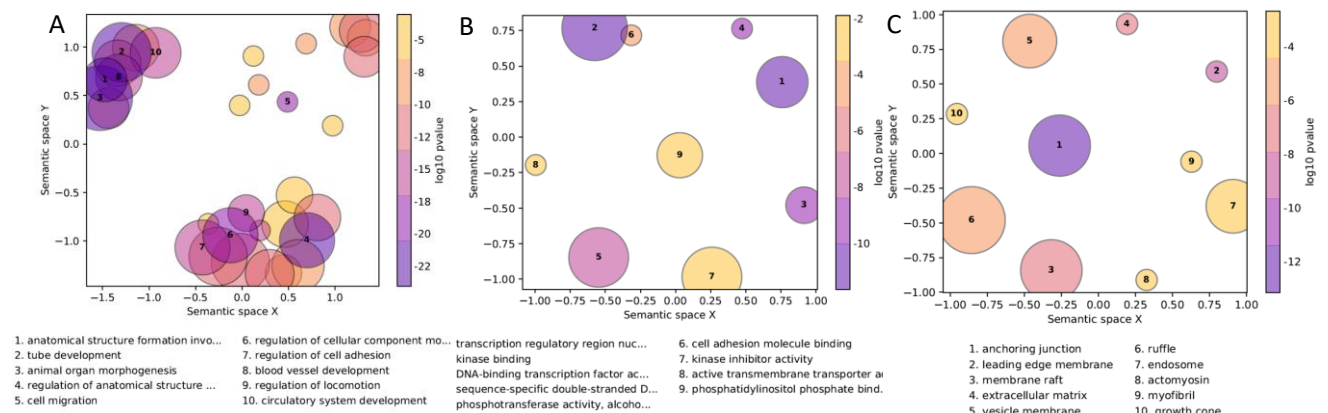

**Additional File S9.** Scatterplot of enriched GO terms ( $p$ -value adjusted  $< 0.05$ ) for genes associated with butyrate differentially accessible regions (DARs) using semantic similarity for biological process (A), molecular function (B) and cellular component (C).
