# Supplementary material
Source: MDPI journal article supplement (https://www.mdpi.com/2673-933X/2/2/15)

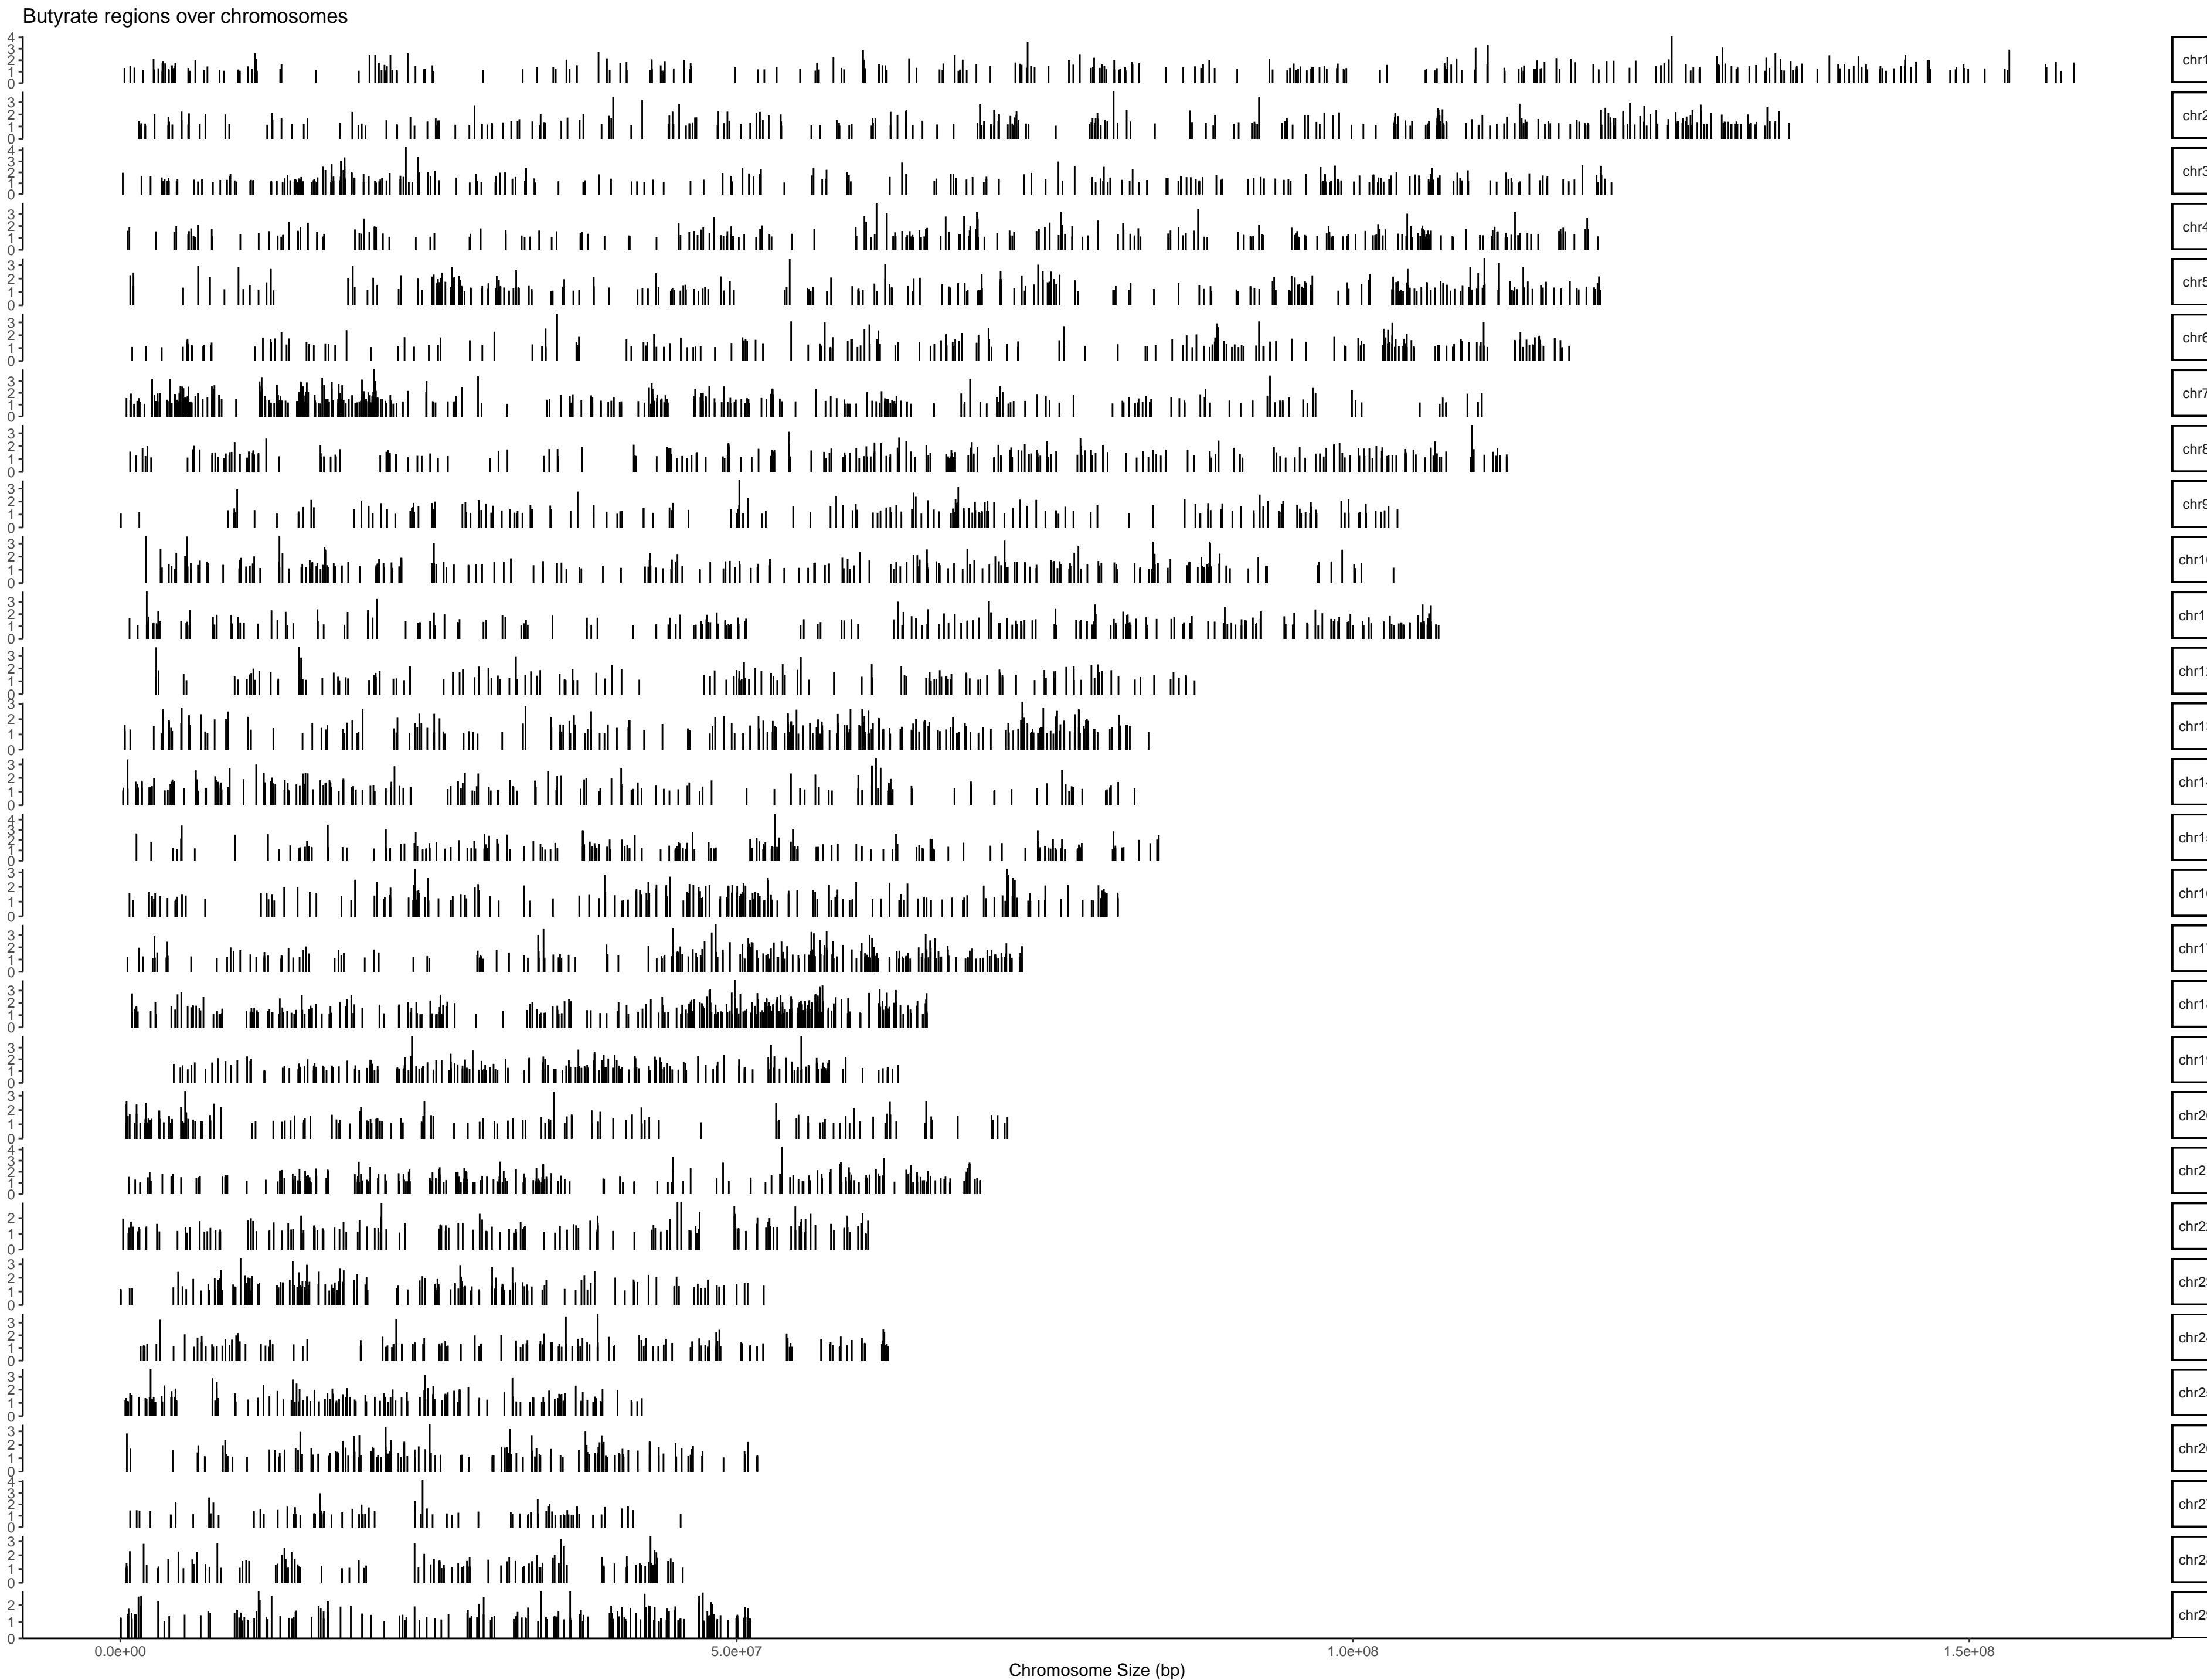

Supplement: s1 [file s1]

# Cluster Dendrogram

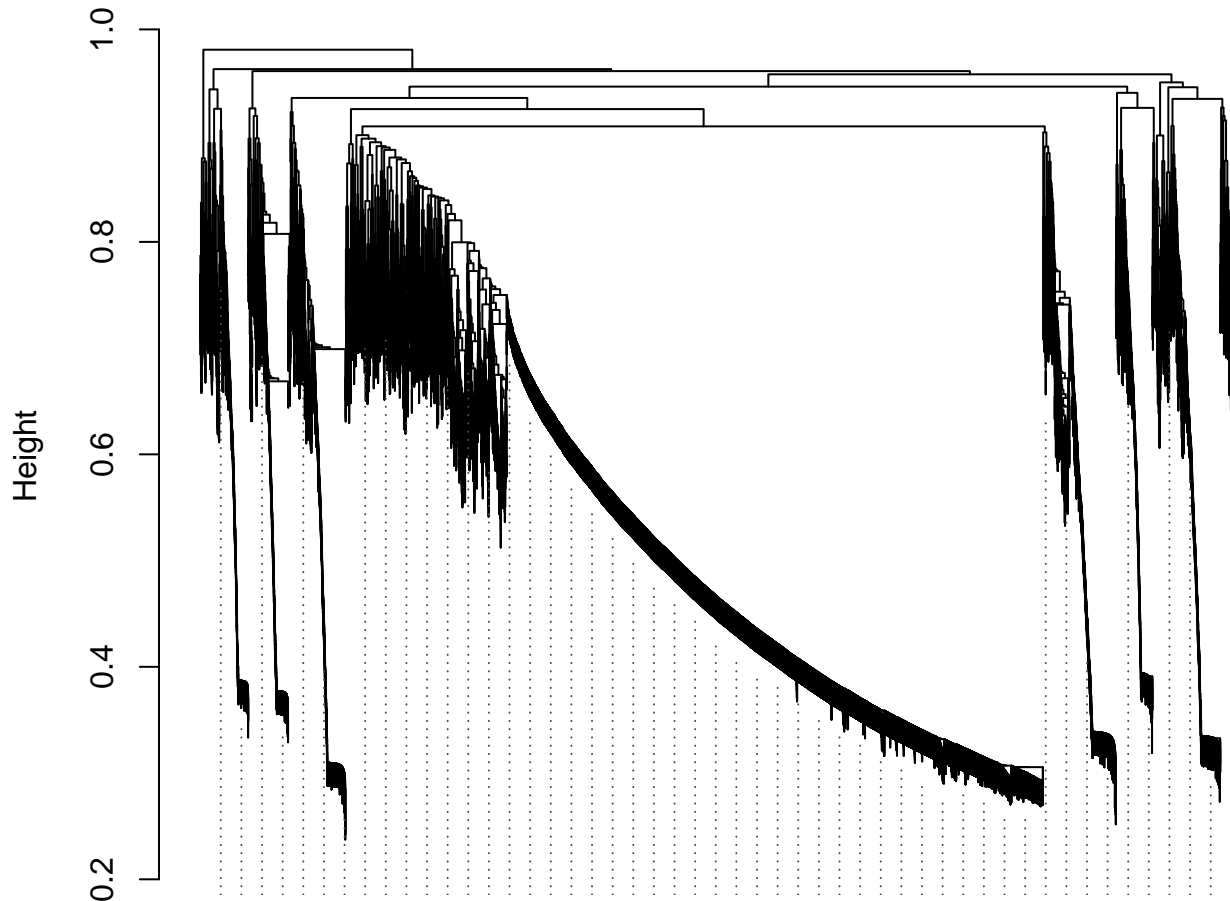

Dynamic Tree Cut

Merged dynamic

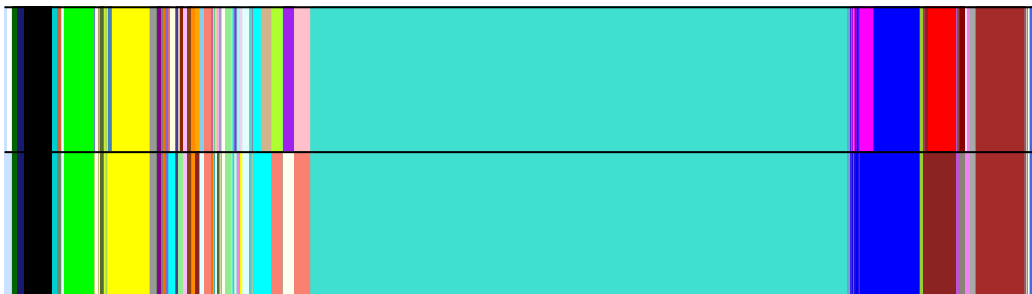

Supplement: s1 [file s1]
